# Supplementary material for: A constrained polynomial regression procedure for estimating the local False Discovery Rate
Source: PubMed Central journal article supplement (PMC1940264; doi:10.1186/1471-2105-8-229), 2007-06-29
Supplement: 1471-2105-8-229-S1.pdf [file 1471-2105-8-229-S1.pdf]

# **Additional Tables for: A constrained polynomial regression procedure for estimating the local False Discovery Rate**

Cyril Dalmasso<sup>\*1</sup>, Avner Bar-Hen<sup>2</sup> and Philippe Broët<sup>1</sup>

<sup>1</sup>JE 2492 - Univ. Paris-Sud, 16 avenue Paul Vaillant Couturier, F94807 Villejuif, France. <sup>2</sup>UMR AgroParisTech/INRA 558, 16 rue Claude Bernard, 75231 Paris, France.

Email: Cyril Dalmasso\* - [dalmasso@vjf.inserm.fr](mailto:dalmasso@vjf.inserm.fr); Avner Bar-Hen - [avner@bar-hen.net](mailto:avner@bar-hen.net); Philippe Broët - [broet@vjf.inserm.fr](mailto:broet@vjf.inserm.fr);

\*Corresponding author

**Table 7 - Estimated values of  $b_1$  restricted to p-values less than or equal to 20% for the five estimators in each independent simulated cases.**

| Case | $m$   | $\pi_0$ | Configuration | <i>polfdr</i> | <i>twilight</i> | <i>LocalFDR</i> | <i>pava.fdr</i> | <i>locfdr</i> |
|------|-------|---------|---------------|---------------|-----------------|-----------------|-----------------|---------------|
| 1    | 500   | 0.6     | (a)           | 0.032         | 0.033           | 0.043           | 0.111           | 0.869         |
| 2    |       |         | (b)           | 0.115         | 0.135           | 0.135           | 0.058           | 0.836         |
| 3    |       |         | (c)           | 0.076         | 0.123           | 0.115           | 0.005           | 0.843         |
| 4    |       | 0.8     | (a)           | 0.062         | 0.131           | 0.033           | 0.115           | 0.695         |
| 5    |       |         | (b)           | 0.049         | 0.097           | 0.084           | 0.022           | 0.599         |
| 6    |       |         | (c)           | 0.044         | 0.156           | 0.072           | 0.056           | 0.555         |
| 7    |       | 0.9     | (a)           | 0.071         | 0.268           | 0.041           | 0.115           | 0.312         |
| 8    |       |         | (b)           | 0.054         | 0.116           | 0.044           | 0.047           | 0.376         |
| 9    |       |         | (c)           | 0.050         | 0.315           | 0.049           | 0.095           | 0.265         |
| 10   |       | 0.98    | (a)           | 0.073         | 0.387           | 0.163           | 0.139           | 0.062         |
| 11   |       |         | (b)           | 0.051         | 0.105           | 0.029           | 0.135           | 0.060         |
| 12   |       |         | (c)           | 0.061         | 0.260           | 0.120           | 0.157           | 0.053         |
| 13   | 5,000 | 0.6     | (a)           | 0.025         | 0.038           | 0.020           | 0.174           | 0.869         |
| 14   |       |         | (b)           | 0.120         | 0.139           | 0.119           | 0.107           | 0.839         |
| 15   |       |         | (c)           | 0.093         | 0.129           | 0.091           | 0.006           | 0.843         |
| 16   |       | 0.8     | (a)           | 0.056         | 0.129           | 0.011           | 0.086           | 0.441         |
| 17   |       |         | (b)           | 0.056         | 0.110           | 0.061           | 0.039           | 0.502         |
| 18   |       |         | (c)           | 0.047         | 0.156           | 0.046           | 0.003           | 0.406         |
| 19   |       | 0.9     | (a)           | 0.083         | 0.268           | 0.039           | 0.055           | 0.183         |
| 20   |       |         | (b)           | 0.025         | 0.123           | 0.033           | 0.011           | 0.297         |
| 21   |       |         | (c)           | 0.057         | 0.316           | 0.043           | 0.029           | 0.184         |
| 22   |       | 0.98    | (a)           | 0.035         | 0.427           | 0.183           | 0.035           | 0.052         |
| 23   |       |         | (b)           | 0.046         | 0.071           | 0.035           | 0.027           | 0.081         |
| 24   |       |         | (c)           | 0.034         | 0.293           | 0.141           | 0.035           | 0.047         |

**Table 8 - Estimated values of b2 restricted to p-values less than or equal to 20% for the five estimators in each independent simulated cases.**

| Case | $m$   | $\pi_0$ | Configuration | <i>polfdr</i> | <i>twilight</i> | <i>LocalFDR</i> | <i>pava.fdr</i> | <i>locfdr</i> |
|------|-------|---------|---------------|---------------|-----------------|-----------------|-----------------|---------------|
| 1    | 500   | 0.6     | (a)           | 0.015         | 0.021           | 0.000           | 0.111           | 0             |
| 2    |       |         | (b)           | 0.000         | 0.016           | 0.000           | 0.000           | 0             |
| 3    |       |         | (c)           | 0.000         | 0.039           | 0.000           | 0.005           | 0             |
| 4    |       | 0.8     | (a)           | 0.057         | 0.131           | 0.000           | 0.115           | 0             |
| 5    |       |         | (b)           | 0.000         | 0.071           | 0.000           | 0.022           | 0             |
| 6    |       |         | (c)           | 0.011         | 0.156           | 0.000           | 0.056           | 0             |
| 7    |       | 0.9     | (a)           | 0.071         | 0.268           | 0.041           | 0.115           | 0             |
| 8    |       |         | (b)           | 0.002         | 0.116           | 0.013           | 0.047           | 0             |
| 9    |       |         | (c)           | 0.040         | 0.315           | 0.049           | 0.095           | 0             |
| 10   |       | 0.98    | (a)           | 0.073         | 0.387           | 0.163           | 0.139           | 0             |
| 11   |       |         | (b)           | 0.051         | 0.105           | 0.029           | 0.135           | 0             |
| 12   |       |         | (c)           | 0.061         | 0.260           | 0.120           | 0.157           | 0             |
| 13   | 5,000 | 0.6     | (a)           | 0.011         | 0.019           | 0.000           | 0.174           | 0             |
| 14   |       |         | (b)           | 0.000         | 0.018           | 0.000           | 0.000           | 0             |
| 15   |       |         | (c)           | 0.000         | 0.041           | 0.000           | 0.000           | 0             |
| 16   |       | 0.8     | (a)           | 0.056         | 0.129           | 0.005           | 0.086           | 0             |
| 17   |       |         | (b)           | 0.000         | 0.079           | 0.000           | 0.000           | 0             |
| 18   |       |         | (c)           | 0.016         | 0.156           | 0.000           | 0.003           | 0             |
| 19   |       | 0.9     | (a)           | 0.083         | 0.268           | 0.039           | 0.055           | 0             |
| 20   |       |         | (b)           | 0.000         | 0.123           | 0.021           | 0.000           | 0             |
| 21   |       |         | (c)           | 0.057         | 0.316           | 0.043           | 0.029           | 0             |
| 22   |       | 0.98    | (a)           | 0.027         | 0.427           | 0.183           | 0.035           | 0             |
| 23   |       |         | (b)           | 0.010         | 0.071           | 0.035           | 0.027           | 0             |
| 24   |       |         | (c)           | 0.018         | 0.293           | 0.141           | 0.035           | 0             |

**Table 9 - Estimated RMISE restricted to p-values less than or equal to 20% for the five estimators in each independent simulated case.**

| Case | $m$   | $\pi_0$ | Configuration | <i>polfdr</i> | <i>twilight</i> | <i>LocalFDR</i> | <i>pava.fdr</i> | <i>locfdr</i> |
|------|-------|---------|---------------|---------------|-----------------|-----------------|-----------------|---------------|
| 1    | 500   | 0.6     | (a)           | 0.033         | 0.042           | 0.062           | 0.055           | 0.197         |
| 2    |       |         | (b)           | 0.054         | 0.057           | 0.069           | 0.043           | 0.264         |
| 3    |       |         | (c)           | 0.043         | 0.058           | 0.070           | 0.042           | 0.233         |
| 4    |       | 0.8     | (a)           | 0.041         | 0.048           | 0.071           | 0.063           | 0.141         |
| 5    |       |         | (b)           | 0.051         | 0.052           | 0.070           | 0.046           | 0.166         |
| 6    |       |         | (c)           | 0.044         | 0.058           | 0.075           | 0.051           | 0.140         |
| 7    |       | 0.9     | (a)           | 0.055         | 0.055           | 0.074           | 0.066           | 0.072         |
| 8    |       |         | (b)           | 0.054         | 0.049           | 0.072           | 0.055           | 0.097         |
| 9    |       |         | (c)           | 0.051         | 0.061           | 0.077           | 0.064           | 0.069         |
| 10   |       | 0.98    | (a)           | 0.065         | 0.072           | 0.078           | 0.064           | 0.029         |
| 11   |       |         | (b)           | 0.052         | 0.054           | 0.076           | 0.059           | 0.031         |
| 12   |       |         | (c)           | 0.059         | 0.063           | 0.080           | 0.061           | 0.030         |
| 13   | 5,000 | 0.6     | (a)           | 0.013         | 0.019           | 0.019           | 0.059           | 0.221         |
| 14   |       |         | (b)           | 0.042         | 0.050           | 0.042           | 0.039           | 0.267         |
| 15   |       |         | (c)           | 0.030         | 0.047           | 0.036           | 0.017           | 0.231         |
| 16   |       | 0.8     | (a)           | 0.019         | 0.038           | 0.023           | 0.038           | 0.115         |
| 17   |       |         | (b)           | 0.026         | 0.041           | 0.030           | 0.025           | 0.157         |
| 18   |       |         | (c)           | 0.023         | 0.052           | 0.028           | 0.020           | 0.124         |
| 19   |       | 0.9     | (a)           | 0.029         | 0.051           | 0.026           | 0.030           | 0.054         |
| 20   |       |         | (b)           | 0.023         | 0.037           | 0.027           | 0.023           | 0.087         |
| 21   |       |         | (c)           | 0.025         | 0.058           | 0.027           | 0.024           | 0.057         |
| 22   |       | 0.98    | (a)           | 0.036         | 0.065           | 0.037           | 0.022           | 0.017         |
| 23   |       |         | (b)           | 0.026         | 0.023           | 0.027           | 0.021           | 0.024         |
| 24   |       |         | (c)           | 0.033         | 0.048           | 0.033           | 0.022           | 0.018         |

**Table 10 - Estimated values of  $b_1$  for the five estimators in each dependent simulated cases.**

| Case | $m$   | $\pi_0$ | Configuration | <i>polfdr</i> | <i>twilight</i> | <i>LocalFDR</i> | <i>pava.fdr</i> | <i>locfdr</i> |
|------|-------|---------|---------------|---------------|-----------------|-----------------|-----------------|---------------|
| 1    | 500   | 0.6     | (a)           | 0.110         | 0.074           | 0.146           | 0.172           | 0.863         |
| 2    |       |         | (b)           | 0.170         | 0.137           | 0.183           | 0.151           | 0.830         |
| 3    |       |         | (c)           | 0.118         | 0.117           | 0.146           | 0.089           | 0.823         |
| 4    |       | 0.8     | (a)           | 0.172         | 0.088           | 0.143           | 0.143           | 0.576         |
| 5    |       |         | (b)           | 0.163         | 0.071           | 0.155           | 0.069           | 0.591         |
| 6    |       |         | (c)           | 0.168         | 0.131           | 0.138           | 0.080           | 0.479         |
| 7    |       | 0.9     | (a)           | 0.125         | 0.244           | 0.083           | 0.159           | 0.263         |
| 8    |       |         | (b)           | 0.122         | 0.079           | 0.109           | 0.104           | 0.340         |
| 9    |       |         | (c)           | 0.098         | 0.294           | 0.084           | 0.142           | 0.240         |
| 10   |       | 0.98    | (a)           | 0.142         | 0.355           | 0.090           | 0.183           | 0.170         |
| 11   |       |         | (b)           | 0.134         | 0.216           | 0.226           | 0.175           | 0.148         |
| 12   |       |         | (c)           | 0.149         | 0.221           | 0.168           | 0.192           | 0.159         |
| 13   | 5,000 | 0.6     | (a)           | 0.034         | 0.041           | 0.026           | 0.202           | 0.869         |
| 14   |       |         | (b)           | 0.171         | 0.167           | 0.164           | 0.162           | 0.831         |
| 15   |       |         | (c)           | 0.118         | 0.135           | 0.115           | 0.066           | 0.827         |
| 16   |       | 0.8     | (a)           | 0.058         | 0.123           | 0.015           | 0.101           | 0.453         |
| 17   |       |         | (b)           | 0.072         | 0.102           | 0.073           | 0.065           | 0.526         |
| 18   |       |         | (c)           | 0.054         | 0.151           | 0.061           | 0.028           | 0.415         |
| 19   |       | 0.9     | (a)           | 0.061         | 0.266           | 0.030           | 0.066           | 0.200         |
| 20   |       |         | (b)           | 0.068         | 0.088           | 0.037           | 0.029           | 0.314         |
| 21   |       |         | (c)           | 0.051         | 0.310           | 0.052           | 0.033           | 0.203         |
| 22   |       | 0.98    | (a)           | 0.056         | 0.410           | 0.151           | 0.070           | 0.045         |
| 23   |       |         | (b)           | 0.039         | 0.083           | 0.036           | 0.052           | 0.071         |
| 24   |       |         | (c)           | 0.055         | 0.286           | 0.109           | 0.071           | 0.040         |

**Table 11 - Estimated values of  $b_2$  for the five estimators in each dependent simulated cases.**

| Case | $m$   | $\pi_0$ | Configuration | <i>polfdr</i> | <i>twilight</i> | <i>LocalFDR</i> | <i>pava.fdr</i> | <i>locfdr</i> |
|------|-------|---------|---------------|---------------|-----------------|-----------------|-----------------|---------------|
| 1    | 500   | 0.6     | (a)           | 0.043         | 0.063           | 0.000           | 0.172           | 0.000         |
| 2    |       |         | (b)           | 0.000         | 0.000           | 0.000           | 0.000           | 0.000         |
| 3    |       |         | (c)           | 0.000         | 0.010           | 0.000           | 0.043           | 0.000         |
| 4    |       | 0.8     | (a)           | 0.074         | 0.088           | 0.002           | 0.143           | 0.009         |
| 5    |       |         | (b)           | 0.000         | 0.017           | 0.000           | 0.041           | 0.013         |
| 6    |       |         | (c)           | 0.026         | 0.131           | 0.000           | 0.080           | 0.010         |
| 7    |       | 0.9     | (a)           | 0.115         | 0.244           | 0.028           | 0.159           | 0.100         |
| 8    |       |         | (b)           | 0.057         | 0.079           | 0.003           | 0.104           | 0.070         |
| 9    |       |         | (c)           | 0.098         | 0.294           | 0.015           | 0.142           | 0.101         |
| 10   |       | 0.98    | (a)           | 0.142         | 0.355           | 0.057           | 0.183           | 0.170         |
| 11   |       |         | (b)           | 0.134         | 0.216           | 0.054           | 0.175           | 0.148         |
| 12   |       |         | (c)           | 0.149         | 0.221           | 0.058           | 0.192           | 0.159         |
| 13   | 5,000 | 0.6     | (a)           | 0.018         | 0.016           | 0.000           | 0.202           | 0.000         |
| 14   |       |         | (b)           | 0.000         | 0.010           | 0.000           | 0.000           | 0.000         |
| 15   |       |         | (c)           | 0.000         | 0.030           | 0.000           | 0.000           | 0.000         |
| 16   |       | 0.8     | (a)           | 0.050         | 0.123           | 0.001           | 0.101           | 0.000         |
| 17   |       |         | (b)           | 0.000         | 0.056           | 0.000           | 0.000           | 0.000         |
| 18   |       |         | (c)           | 0.000         | 0.151           | 0.000           | 0.016           | 0.000         |
| 19   |       | 0.9     | (a)           | 0.061         | 0.266           | 0.030           | 0.066           | 0.006         |
| 20   |       |         | (b)           | 0.000         | 0.088           | 0.000           | 0.005           | 0.000         |
| 21   |       |         | (c)           | 0.032         | 0.310           | 0.032           | 0.033           | 0.000         |
| 22   |       | 0.98    | (a)           | 0.056         | 0.410           | 0.151           | 0.070           | 0.033         |
| 23   |       |         | (b)           | 0.039         | 0.083           | 0.017           | 0.052           | 0.027         |
| 24   |       |         | (c)           | 0.055         | 0.286           | 0.109           | 0.071           | 0.026         |

**Table 12 - Estimated RMISE for the five estimators in each dependent simulated case.**

| Case | $m$   | $\pi_0$ | Configuration | $polfdr$ | $twilight$ | $LocalFDR$ | $pava.fdr$ | $locfdr$ |
|------|-------|---------|---------------|----------|------------|------------|------------|----------|
| 1    | 500   | 0.6     | (a)           | 0.129    | 0.159      | 0.315      | 0.196      | 0.182    |
| 2    |       |         | (b)           | 0.200    | 0.194      | 0.302      | 0.167      | 0.323    |
| 3    |       |         | (c)           | 0.157    | 0.166      | 0.285      | 0.146      | 0.268    |
| 4    |       | 0.8     | (a)           | 0.141    | 0.145      | 0.282      | 0.171      | 0.137    |
| 5    |       |         | (b)           | 0.150    | 0.158      | 0.262      | 0.144      | 0.193    |
| 6    |       |         | (c)           | 0.145    | 0.136      | 0.265      | 0.150      | 0.154    |
| 7    |       | 0.9     | (a)           | 0.157    | 0.152      | 0.257      | 0.174      | 0.081    |
| 8    |       |         | (b)           | 0.143    | 0.165      | 0.241      | 0.153      | 0.111    |
| 9    |       |         | (c)           | 0.151    | 0.150      | 0.250      | 0.164      | 0.084    |
| 10   |       | 0.98    | (a)           | 0.149    | 0.239      | 0.264      | 0.167      | 0.055    |
| 11   |       |         | (b)           | 0.151    | 0.276      | 0.291      | 0.167      | 0.057    |
| 12   |       |         | (c)           | 0.156    | 0.258      | 0.292      | 0.177      | 0.055    |
| 13   | 5,000 | 0.6     | (a)           | 0.058    | 0.066      | 0.088      | 0.188      | 0.207    |
| 14   |       |         | (b)           | 0.155    | 0.161      | 0.162      | 0.132      | 0.342    |
| 15   |       |         | (c)           | 0.111    | 0.126      | 0.134      | 0.057      | 0.277    |
| 16   |       | 0.8     | (a)           | 0.055    | 0.063      | 0.090      | 0.099      | 0.121    |
| 17   |       |         | (b)           | 0.086    | 0.090      | 0.106      | 0.070      | 0.188    |
| 18   |       |         | (c)           | 0.071    | 0.081      | 0.104      | 0.056      | 0.144    |
| 19   |       | 0.9     | (a)           | 0.068    | 0.065      | 0.092      | 0.074      | 0.061    |
| 20   |       |         | (b)           | 0.071    | 0.067      | 0.091      | 0.063      | 0.104    |
| 21   |       |         | (c)           | 0.067    | 0.070      | 0.094      | 0.063      | 0.069    |
| 22   |       | 0.98    | (a)           | 0.067    | 0.091      | 0.090      | 0.064      | 0.026    |
| 23   |       |         | (b)           | 0.062    | 0.099      | 0.092      | 0.059      | 0.034    |
| 24   |       |         | (c)           | 0.065    | 0.092      | 0.091      | 0.063      | 0.027    |

**Table 13 - Mean of all estimates of  $\pi_0$  for the five estimators in each dependent simulated case.**

| Case | $m$   | $\pi_0$ | Configuration | <i>polfdr</i> | <i>twilight</i> | <i>LocalFDR</i> | <i>pava.fdr</i> | <i>locfdr</i> |
|------|-------|---------|---------------|---------------|-----------------|-----------------|-----------------|---------------|
| 1    | 500   | 0.6     | (a)           | 0.585         | 0.612           | 0.503           | 0.928           | 0.595         |
| 2    |       |         | (b)           | 0.707         | 0.713           | 0.649           | 0.945           | 0.702         |
| 3    |       |         | (c)           | 0.648         | 0.665           | 0.583           | 0.897           | 0.656         |
| 4    |       | 0.8     | (a)           | 0.764         | 0.795           | 0.710           | 0.885           | 0.779         |
| 5    |       |         | (b)           | 0.823         | 0.834           | 0.783           | 0.953           | 0.805         |
| 6    |       |         | (c)           | 0.797         | 0.820           | 0.751           | 0.924           | 0.810         |
| 7    |       | 0.9     | (a)           | 0.837         | 0.855           | 0.797           | 0.951           | 0.848         |
| 8    |       |         | (b)           | 0.873         | 0.876           | 0.829           | 0.980           | 0.836         |
| 9    |       |         | (c)           | 0.852         | 0.864           | 0.811           | 0.965           | 0.852         |
| 10   |       | 0.98    | (a)           | 0.925         | 0.911           | 0.876           | 1.015           | 0.811         |
| 11   |       |         | (b)           | 0.925         | 0.907           | 0.878           | 1.018           | 0.771         |
| 12   |       |         | (c)           | 0.924         | 0.903           | 0.868           | 1.020           | 0.787         |
| 13   | 5,000 | 0.6     | (a)           | 0.603         | 0.612           | 0.475           | 0.861           | 0.613         |
| 14   |       |         | (b)           | 0.719         | 0.718           | 0.699           | 0.893           | 0.725         |
| 15   |       |         | (c)           | 0.669         | 0.678           | 0.608           | 0.841           | 0.682         |
| 16   |       | 0.8     | (a)           | 0.793         | 0.802           | 0.724           | 0.851           | 0.799         |
| 17   |       |         | (b)           | 0.848         | 0.857           | 0.832           | 0.920           | 0.858         |
| 18   |       |         | (c)           | 0.828         | 0.845           | 0.794           | 0.892           | 0.842         |
| 19   |       | 0.9     | (a)           | 0.878         | 0.902           | 0.853           | 0.920           | 0.895         |
| 20   |       |         | (b)           | 0.914         | 0.924           | 0.905           | 0.956           | 0.921         |
| 21   |       |         | (c)           | 0.899         | 0.917           | 0.882           | 0.937           | 0.911         |
| 22   |       | 0.98    | (a)           | 0.960         | 0.963           | 0.949           | 0.986           | 0.951         |
| 23   |       |         | (b)           | 0.965         | 0.966           | 0.957           | 0.993           | 0.933         |
| 24   |       |         | (c)           | 0.962         | 0.963           | 0.951           | 0.990           | 0.943         |



**Table 14 - Mean square error of all estimates of  $\pi_0$  for the five estimators in each dependent simulated case.**

| Case | $m$   | $\pi_0$ | Configuration | <i>polfdr</i> | <i>twilight</i> | <i>LocalFDR</i> | <i>pava.fdr</i> | <i>locfdr</i> |
|------|-------|---------|---------------|---------------|-----------------|-----------------|-----------------|---------------|
| 1    | 500   | 0.6     | (a)           | 0.113         | 0.169           | 0.156           | 0.378           | 0.130         |
| 2    |       |         | (b)           | 0.189         | 0.218           | 0.167           | 0.370           | 0.188         |
| 3    |       |         | (c)           | 0.141         | 0.189           | 0.134           | 0.329           | 0.156         |
| 4    |       | 0.8     | (a)           | 0.127         | 0.168           | 0.158           | 0.118           | 0.137         |
| 5    |       |         | (b)           | 0.150         | 0.161           | 0.148           | 0.172           | 0.141         |
| 6    |       |         | (c)           | 0.138         | 0.167           | 0.151           | 0.144           | 0.142         |
| 7    |       | 0.9     | (a)           | 0.147         | 0.159           | 0.170           | 0.079           | 0.143         |
| 8    |       |         | (b)           | 0.139         | 0.146           | 0.153           | 0.102           | 0.140         |
| 9    |       |         | (c)           | 0.144         | 0.153           | 0.162           | 0.090           | 0.137         |
| 10   |       | 0.98    | (a)           | 0.144         | 0.143           | 0.162           | 0.083           | 0.217         |
| 11   |       |         | (b)           | 0.154         | 0.149           | 0.165           | 0.084           | 0.265         |
| 12   |       |         | (c)           | 0.153         | 0.155           | 0.175           | 0.084           | 0.240         |
| 13   | 5,000 | 0.6     | (a)           | 0.042         | 0.054           | 0.132           | 0.264           | 0.046         |
| 14   |       |         | (b)           | 0.133         | 0.135           | 0.112           | 0.295           | 0.138         |
| 15   |       |         | (c)           | 0.088         | 0.098           | 0.042           | 0.244           | 0.097         |
| 16   |       | 0.8     | (a)           | 0.044         | 0.061           | 0.082           | 0.055           | 0.048         |
| 17   |       |         | (b)           | 0.075         | 0.086           | 0.060           | 0.122           | 0.080         |
| 18   |       |         | (c)           | 0.058         | 0.078           | 0.040           | 0.094           | 0.066         |
| 19   |       | 0.9     | (a)           | 0.055         | 0.061           | 0.062           | 0.029           | 0.047         |
| 20   |       |         | (b)           | 0.055         | 0.063           | 0.052           | 0.061           | 0.054         |
| 21   |       |         | (c)           | 0.052         | 0.063           | 0.050           | 0.043           | 0.050         |
| 22   |       | 0.98    | (a)           | 0.049         | 0.048           | 0.050           | 0.026           | 0.051         |
| 23   |       |         | (b)           | 0.050         | 0.046           | 0.044           | 0.028           | 0.080         |
| 24   |       |         | (c)           | 0.050         | 0.048           | 0.050           | 0.027           | 0.063         |

**Table 15 - Estimated values of  $b_1$  restricted to p-values smaller to 20% for the five estimators in each dependent simulated cases.**

| Case | $m$   | $\pi_0$ | Configuration | <i>polfdr</i> | <i>twilight</i> | <i>LocalFDR</i> | <i>pava.fdr</i> | <i>locfdr</i> |
|------|-------|---------|---------------|---------------|-----------------|-----------------|-----------------|---------------|
| 1    | 500   | 0.6     | (a)           | 0.110         | 0.074           | 0.146           | 0.134           | 0.863         |
| 2    |       |         | (b)           | 0.128         | 0.137           | 0.183           | 0.081           | 0.830         |
| 3    |       |         | (c)           | 0.107         | 0.117           | 0.146           | 0.033           | 0.823         |
| 4    |       | 0.8     | (a)           | 0.172         | 0.088           | 0.143           | 0.140           | 0.576         |
| 5    |       |         | (b)           | 0.163         | 0.071           | 0.155           | 0.069           | 0.591         |
| 6    |       |         | (c)           | 0.168         | 0.131           | 0.138           | 0.076           | 0.479         |
| 7    |       | 0.9     | (a)           | 0.125         | 0.244           | 0.083           | 0.159           | 0.263         |
| 8    |       |         | (b)           | 0.122         | 0.062           | 0.109           | 0.104           | 0.340         |
| 9    |       |         | (c)           | 0.098         | 0.294           | 0.084           | 0.142           | 0.240         |
| 10   |       | 0.98    | (a)           | 0.142         | 0.355           | 0.090           | 0.183           | 0.050         |
| 11   |       |         | (b)           | 0.134         | 0.204           | 0.226           | 0.175           | 0.049         |
| 12   |       |         | (c)           | 0.149         | 0.221           | 0.168           | 0.192           | 0.044         |
| 13   | 5,000 | 0.6     | (a)           | 0.034         | 0.041           | 0.025           | 0.165           | 0.869         |
| 14   |       |         | (b)           | 0.123         | 0.145           | 0.123           | 0.101           | 0.831         |
| 15   |       |         | (c)           | 0.092         | 0.135           | 0.101           | 0.018           | 0.827         |
| 16   |       | 0.8     | (a)           | 0.058         | 0.123           | 0.015           | 0.096           | 0.453         |
| 17   |       |         | (b)           | 0.052         | 0.102           | 0.065           | 0.031           | 0.526         |
| 18   |       |         | (c)           | 0.054         | 0.151           | 0.061           | 0.015           | 0.415         |
| 19   |       | 0.9     | (a)           | 0.061         | 0.266           | 0.030           | 0.066           | 0.200         |
| 20   |       |         | (b)           | 0.068         | 0.088           | 0.037           | 0.020           | 0.314         |
| 21   |       |         | (c)           | 0.051         | 0.310           | 0.052           | 0.033           | 0.203         |
| 22   |       | 0.98    | (a)           | 0.056         | 0.410           | 0.151           | 0.070           | 0.045         |
| 23   |       |         | (b)           | 0.039         | 0.083           | 0.036           | 0.052           | 0.071         |
| 24   |       |         | (c)           | 0.055         | 0.286           | 0.109           | 0.071           | 0.040         |

**Table 16 - Estimated values of  $b_2$  restricted to p-values smaller to 20% for the five estimators in each dependent simulated cases.**

| Case | $m$   | $\pi_0$ | Configuration | <i>polfdr</i> | <i>twilight</i> | <i>LocalFDR</i> | <i>pava.fdr</i> | <i>locfdr</i> |
|------|-------|---------|---------------|---------------|-----------------|-----------------|-----------------|---------------|
| 1    | 500   | 0.6     | (a)           | 0.042         | 0.000           | 0.000           | 0.134           | 0             |
| 2    |       |         | (b)           | 0.000         | 0.000           | 0.000           | 0.000           | 0             |
| 3    |       |         | (c)           | 0.000         | 0.010           | 0.000           | 0.029           | 0             |
| 4    |       | 0.8     | (a)           | 0.074         | 0.088           | 0.000           | 0.140           | 0             |
| 5    |       |         | (b)           | 0.000         | 0.000           | 0.000           | 0.033           | 0             |
| 6    |       |         | (c)           | 0.024         | 0.131           | 0.000           | 0.076           | 0             |
| 7    |       | 0.9     | (a)           | 0.115         | 0.244           | 0.000           | 0.159           | 0             |
| 8    |       |         | (b)           | 0.057         | 0.062           | 0.000           | 0.104           | 0             |
| 9    |       |         | (c)           | 0.098         | 0.294           | 0.010           | 0.142           | 0             |
| 10   |       | 0.98    | (a)           | 0.142         | 0.355           | 0.003           | 0.183           | 0             |
| 11   |       |         | (b)           | 0.134         | 0.204           | 0.007           | 0.175           | 0             |
| 12   |       |         | (c)           | 0.149         | 0.221           | 0.013           | 0.192           | 0             |
| 13   | 5,000 | 0.6     | (a)           | 0.018         | 0.016           | 0.000           | 0.165           | 0             |
| 14   |       |         | (b)           | 0.000         | 0.010           | 0.000           | 0.000           | 0             |
| 15   |       |         | (c)           | 0.000         | 0.030           | 0.000           | 0.000           | 0             |
| 16   |       | 0.8     | (a)           | 0.050         | 0.123           | 0.001           | 0.096           | 0             |
| 17   |       |         | (b)           | 0.000         | 0.056           | 0.000           | 0.000           | 0             |
| 18   |       |         | (c)           | 0.000         | 0.151           | 0.000           | 0.014           | 0             |
| 19   |       | 0.9     | (a)           | 0.061         | 0.266           | 0.030           | 0.066           | 0             |
| 20   |       |         | (b)           | 0.000         | 0.088           | 0.000           | 0.004           | 0             |
| 21   |       |         | (c)           | 0.032         | 0.310           | 0.032           | 0.033           | 0             |
| 22   |       | 0.98    | (a)           | 0.056         | 0.410           | 0.151           | 0.070           | 0             |
| 23   |       |         | (b)           | 0.039         | 0.083           | 0.008           | 0.052           | 0             |
| 24   |       |         | (c)           | 0.055         | 0.286           | 0.109           | 0.071           | 0             |

**Table 17 - Estimated RMISE restricted to p-values less than or equal to 20% for the five estimators in each dependent simulated case.**

| Case | $m$   | $\pi_0$ | Configuration | <i>polfdr</i> | <i>twilight</i> | <i>LocalFDR</i> | <i>pava.fdr</i> | <i>locfdr</i> |
|------|-------|---------|---------------|---------------|-----------------|-----------------|-----------------|---------------|
| 1    | 500   | 0.6     | (a)           | 0.083         | 0.104           | 0.193           | 0.097           | 0.173         |
| 2    |       |         | (b)           | 0.114         | 0.113           | 0.162           | 0.099           | 0.251         |
| 3    |       |         | (c)           | 0.093         | 0.107           | 0.156           | 0.090           | 0.224         |
| 4    |       | 0.8     | (a)           | 0.102         | 0.094           | 0.188           | 0.104           | 0.133         |
| 5    |       |         | (b)           | 0.110         | 0.102           | 0.174           | 0.099           | 0.165         |
| 6    |       |         | (c)           | 0.109         | 0.095           | 0.170           | 0.101           | 0.136         |
| 7    |       | 0.9     | (a)           | 0.116         | 0.099           | 0.173           | 0.115           | 0.073         |
| 8    |       |         | (b)           | 0.107         | 0.099           | 0.159           | 0.102           | 0.096         |
| 9    |       |         | (c)           | 0.114         | 0.100           | 0.168           | 0.112           | 0.072         |
| 10   |       | 0.98    | (a)           | 0.114         | 0.113           | 0.195           | 0.117           | 0.036         |
| 11   |       |         | (b)           | 0.111         | 0.118           | 0.231           | 0.119           | 0.038         |
| 12   |       |         | (c)           | 0.117         | 0.120           | 0.228           | 0.124           | 0.036         |
| 13   | 5,000 | 0.6     | (a)           | 0.032         | 0.044           | 0.047           | 0.062           | 0.196         |
| 14   |       |         | (b)           | 0.056         | 0.063           | 0.058           | 0.049           | 0.266         |
| 15   |       |         | (c)           | 0.046         | 0.064           | 0.058           | 0.034           | 0.230         |
| 16   |       | 0.8     | (a)           | 0.041         | 0.050           | 0.057           | 0.049           | 0.117         |
| 17   |       |         | (b)           | 0.052         | 0.057           | 0.056           | 0.046           | 0.161         |
| 18   |       |         | (c)           | 0.047         | 0.061           | 0.062           | 0.041           | 0.126         |
| 19   |       | 0.9     | (a)           | 0.053         | 0.056           | 0.064           | 0.051           | 0.059         |
| 20   |       |         | (b)           | 0.057         | 0.053           | 0.061           | 0.051           | 0.092         |
| 21   |       |         | (c)           | 0.054         | 0.061           | 0.066           | 0.051           | 0.062         |
| 22   |       | 0.98    | (a)           | 0.057         | 0.073           | 0.067           | 0.051           | 0.021         |
| 23   |       |         | (b)           | 0.051         | 0.055           | 0.072           | 0.049           | 0.029         |
| 24   |       |         | (c)           | 0.055         | 0.063           | 0.068           | 0.051           | 0.022         |
