# Supplementary material for: A constrained polynomial regression procedure for estimating the local False Discovery Rate
Source: PubMed Central journal article supplement (PMC1940264; doi:10.1186/1471-2105-8-229), 2007-06-29
Supplement: 1471-2105-8-229-S3.pdf [file 1471-2105-8-229-S3.pdf]

# **Additional Figures for: A constrained polynomial regression procedure for estimating the local False Discovery Rate**

Cyril Dalmasso<sup>\*1</sup>, Avner Bar-Hen<sup>2</sup> and Philippe Broët<sup>1</sup>

<sup>1</sup>JE 2492 - Univ. Paris-Sud, 16 avenue Paul Vaillant Couturier, F94807 Villejuif, France. <sup>2</sup>UMR AgroParisTech/INRA 558, 16 rue Claude Bernard, 75231 Paris, France.

Email: Cyril Dalmasso\* - [dalmasso@vjf.inserm.fr](mailto:dalmasso@vjf.inserm.fr); Avner Bar-Hen - [avner@bar-hen.net](mailto:avner@bar-hen.net); Philippe Broët - [broet@vjf.inserm.fr](mailto:broet@vjf.inserm.fr);

\*Corresponding author

## **Dependent datasets**

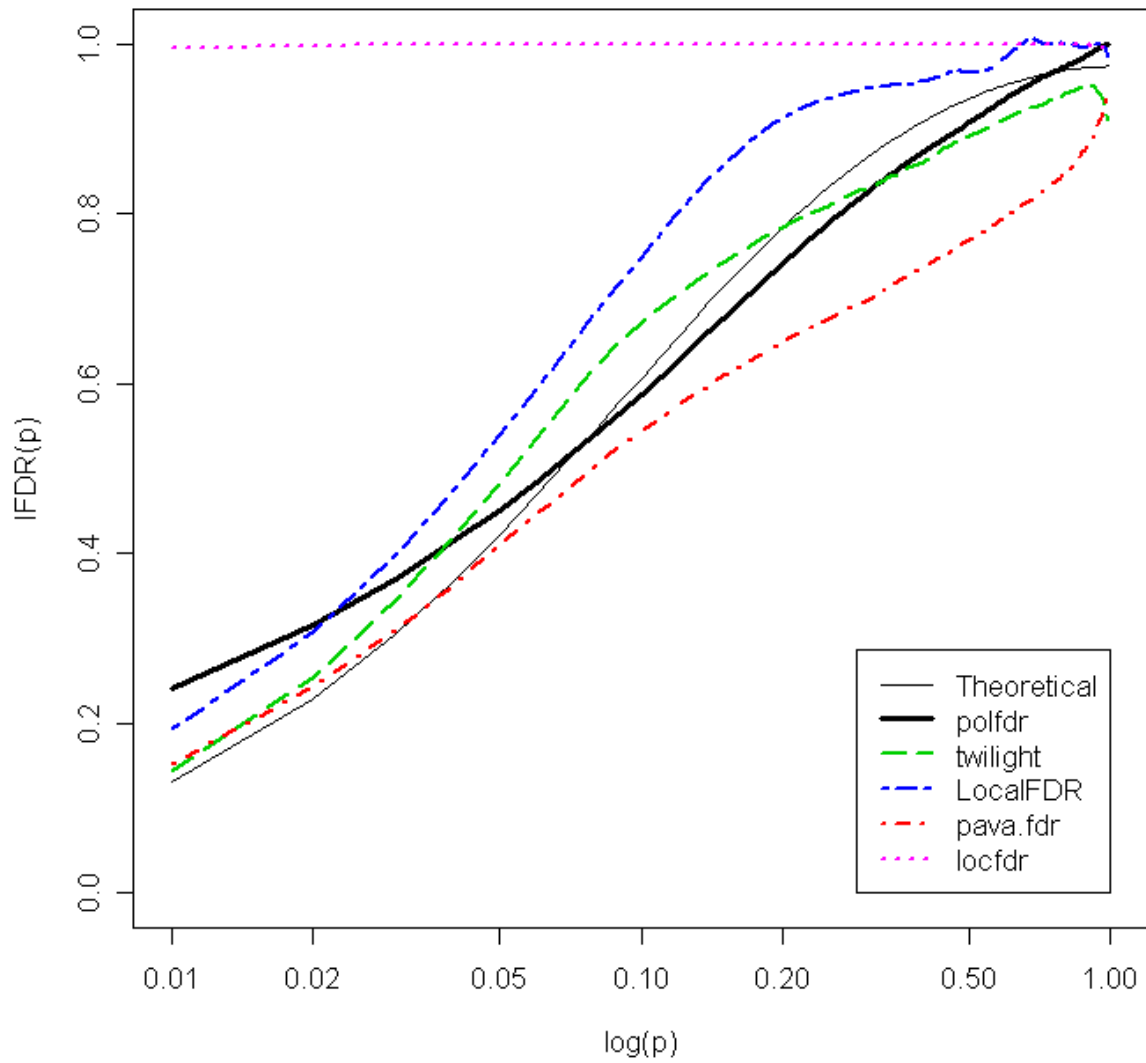

Figure 30: Expected IFDR as a function of  $p$  for each estimator with  $m=500$ ,  $\pi_0=0.6$  and configuration (a).

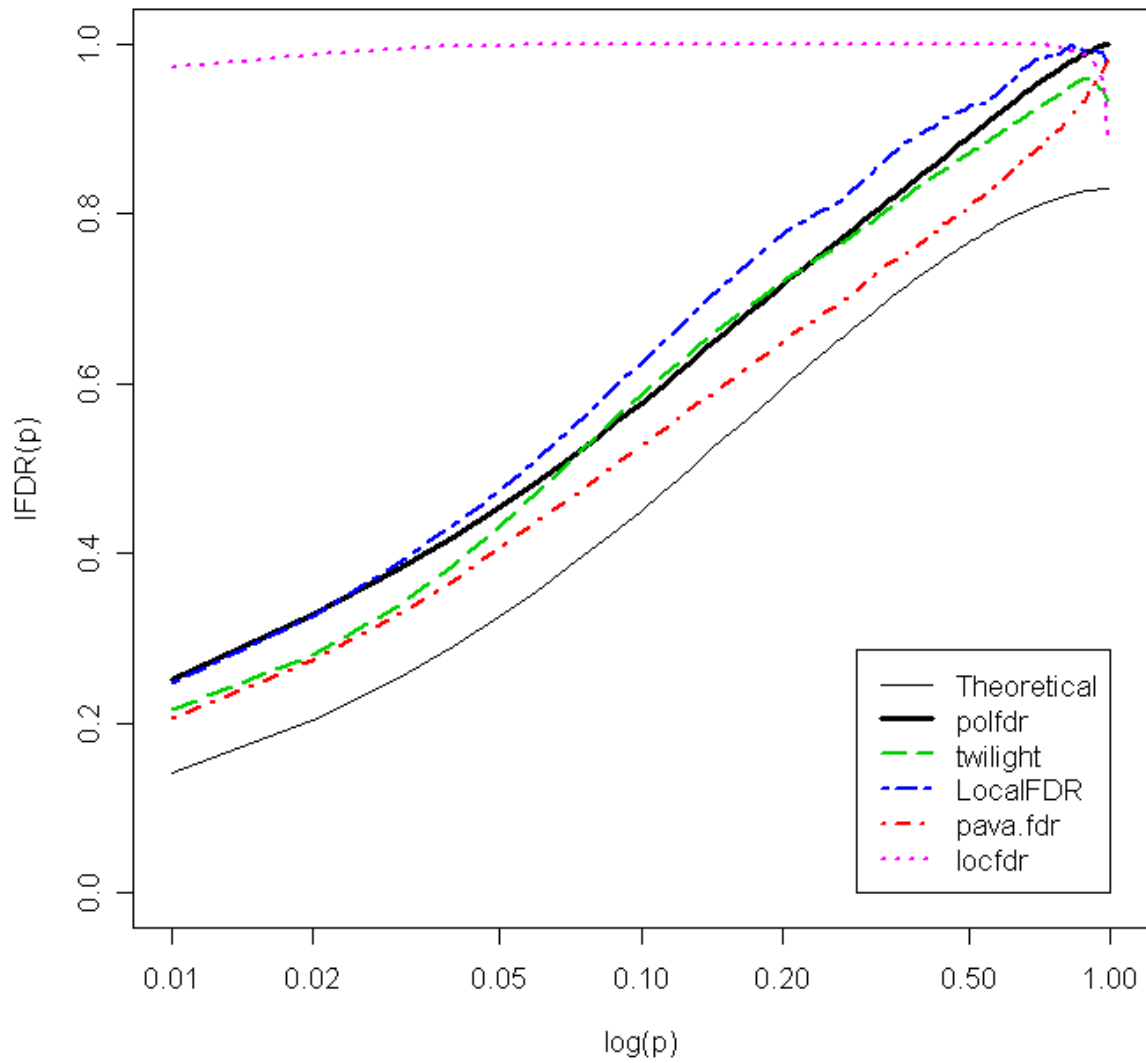

Figure 31: Expected IFDR as a function of  $p$  for each estimator with  $m=500$ ,  $\pi_0=0.6$  and configuration (b).

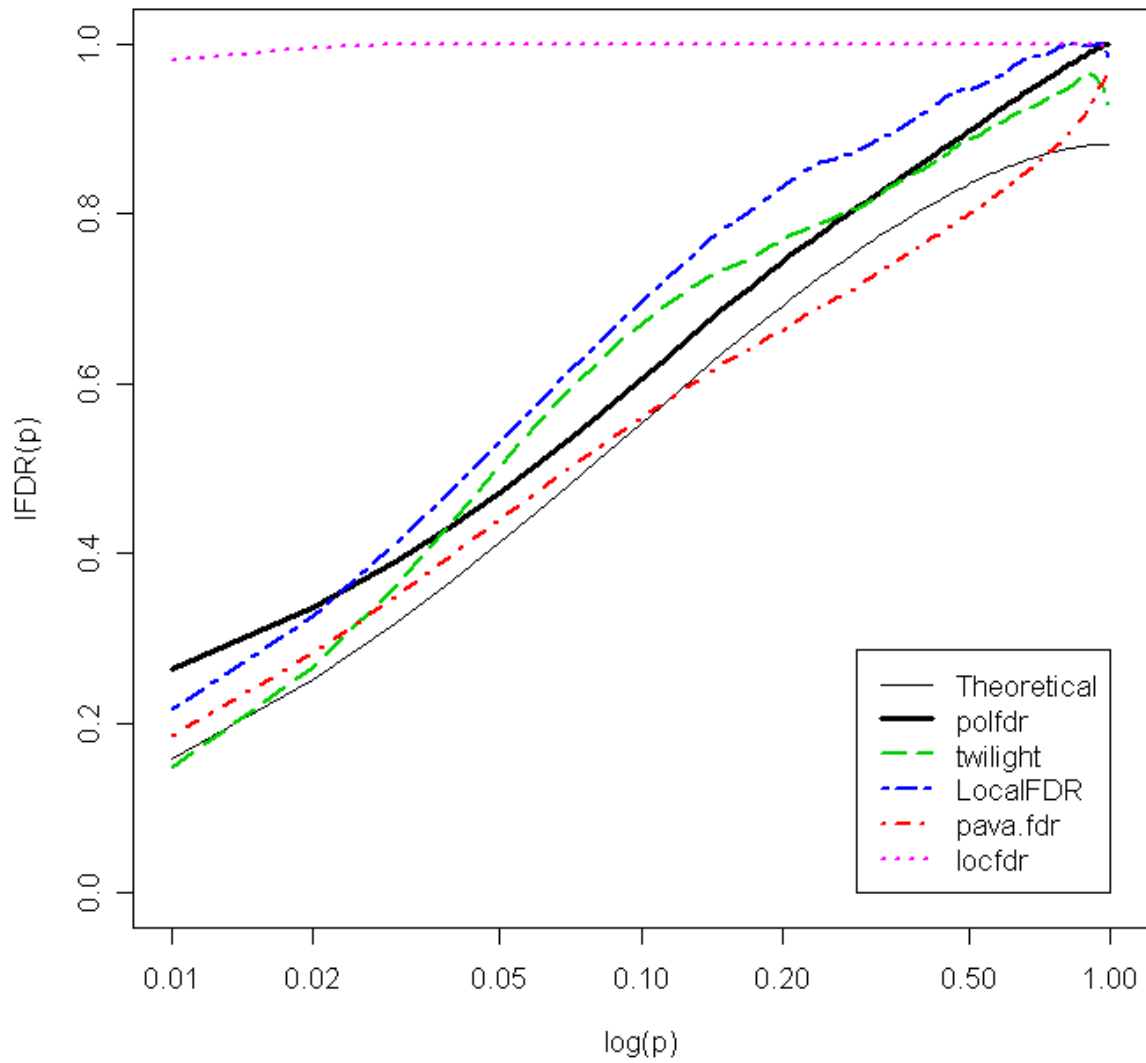

Figure 32: Expected IFDR as a function of  $p$  for each estimator with  $m=500$ ,  $\pi_0=0.6$  and configuration (c).

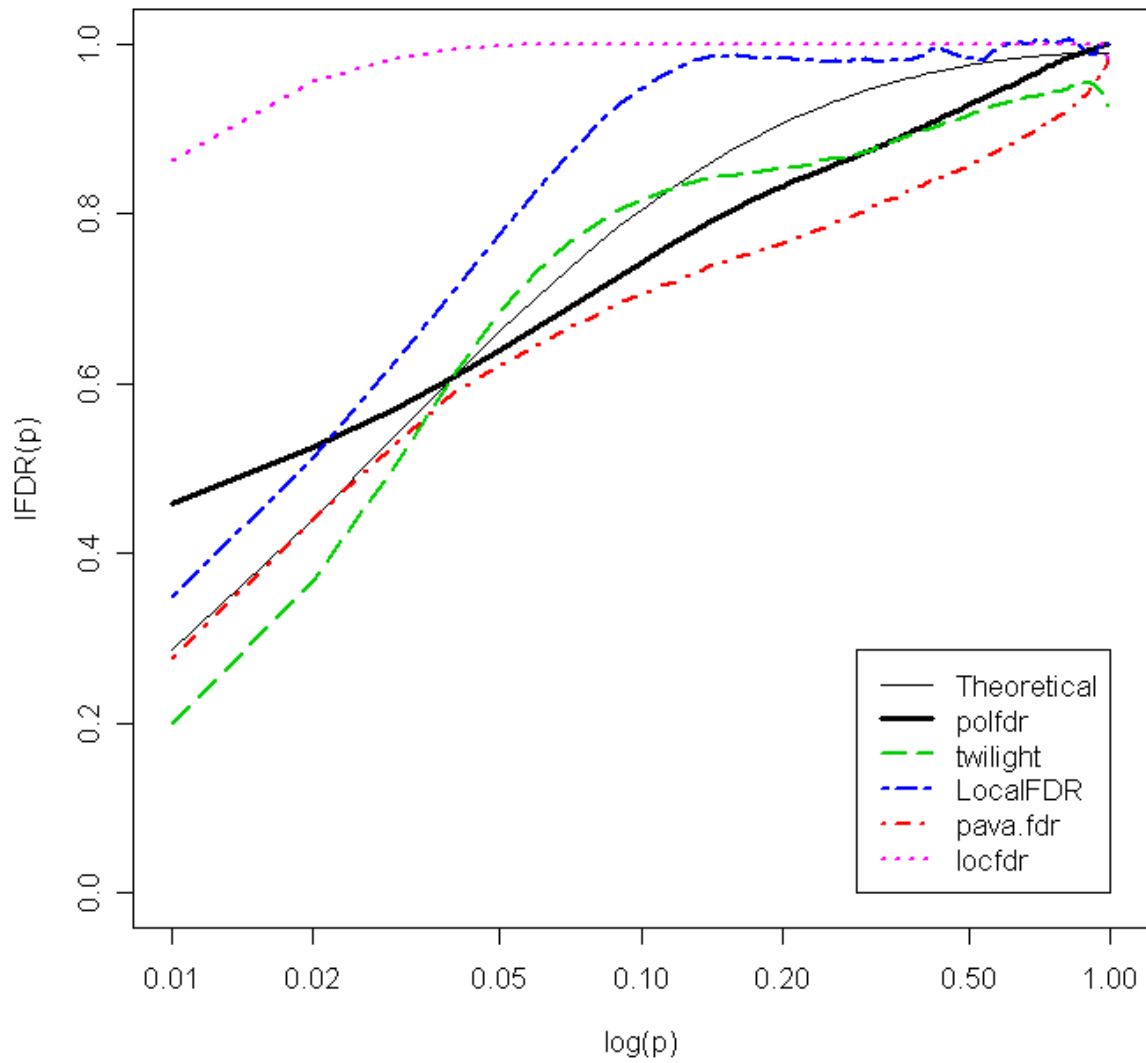

Figure 33: Expected IFDR as a function of  $p$  for each estimator with  $m=500$ ,  $\pi_0=0.8$  and configuration (a).

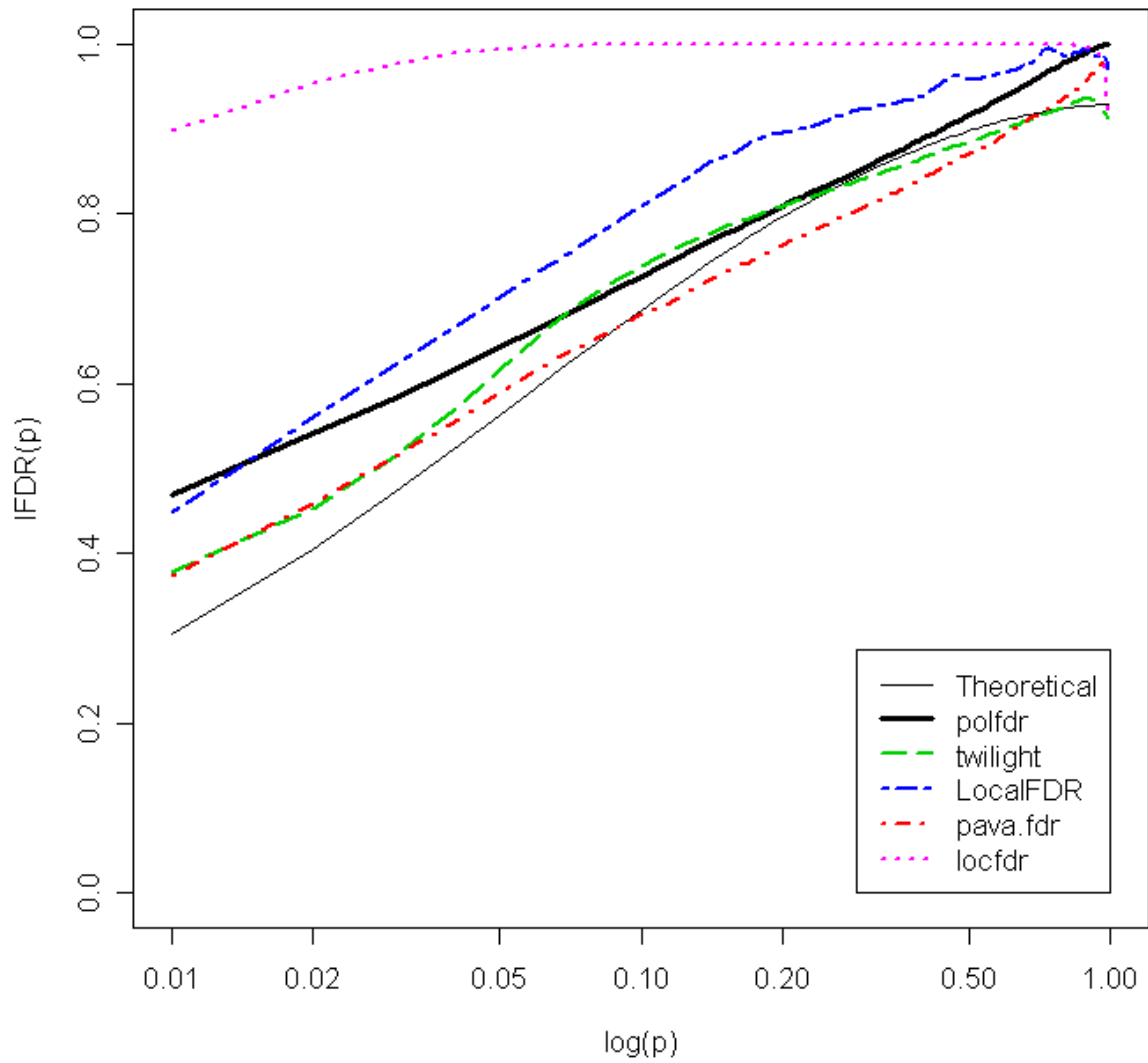

Figure 34: Expected IFDR as a function of  $p$  for each estimator with  $m=500$ ,  $\pi_0=0.8$  and configuration (b).

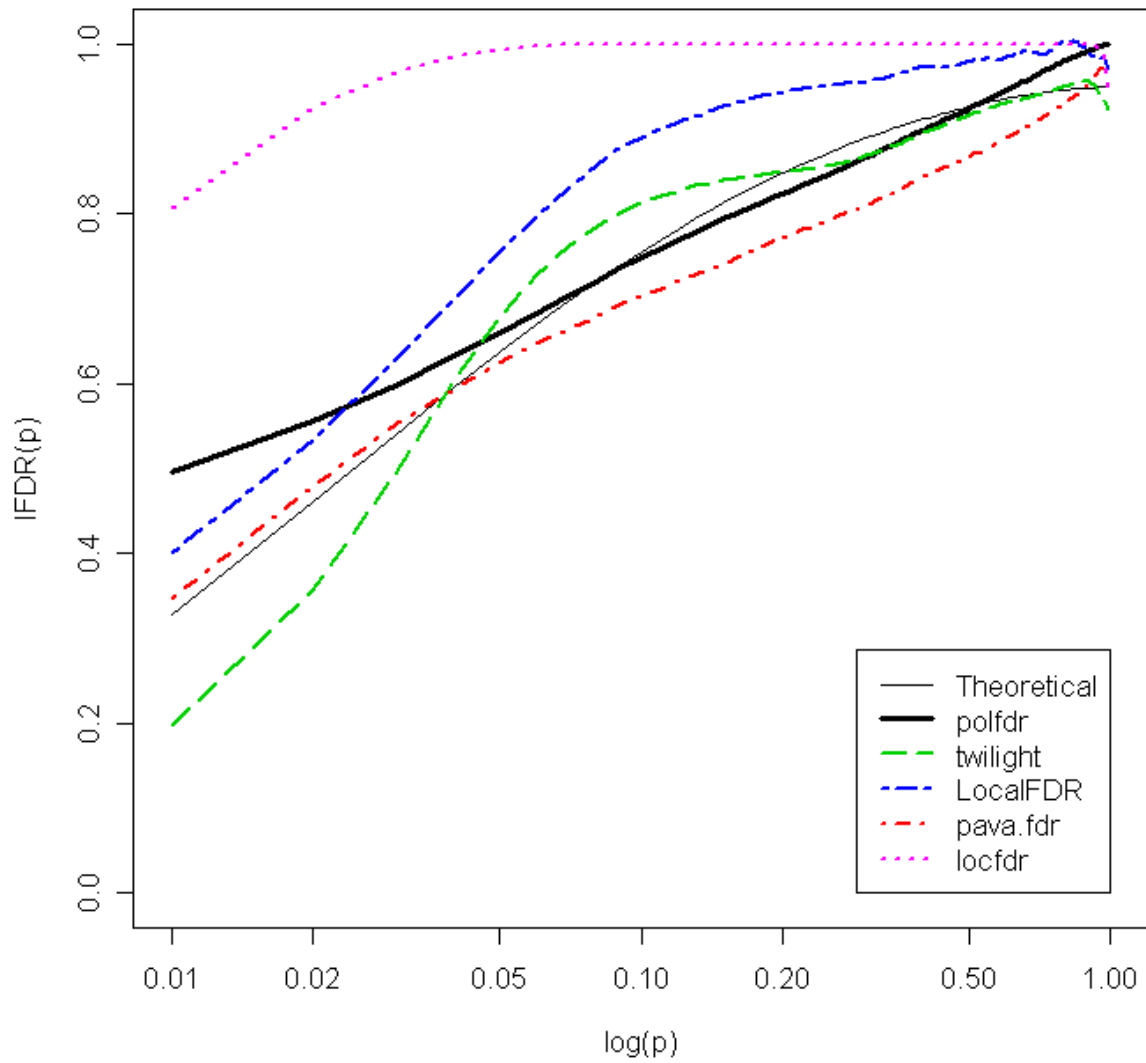

Figure 35: Expected IFDR as a function of  $p$  for each estimator with  $m=500$ ,  $\pi_0=0.8$  and configuration (c).

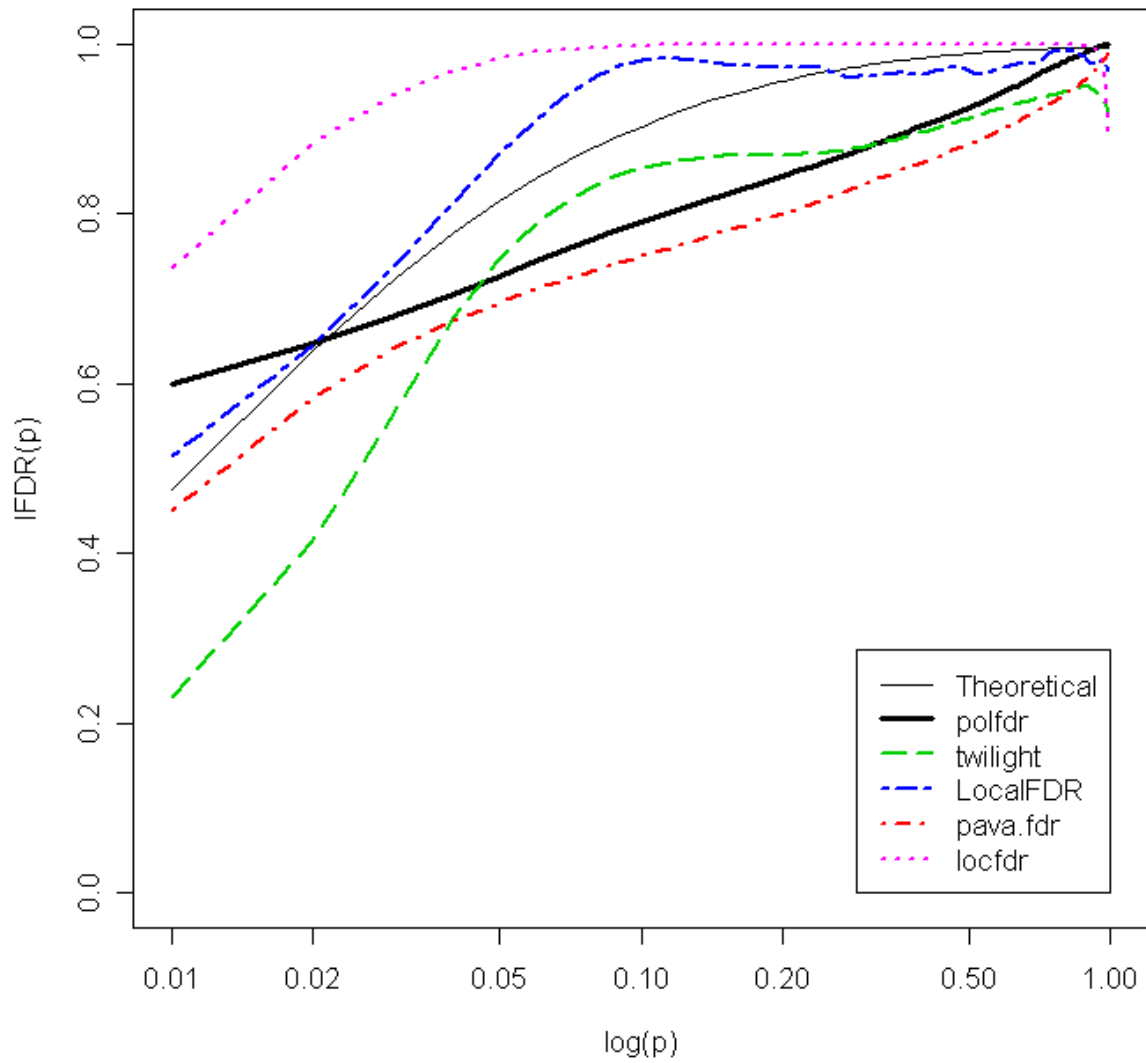

Figure 36: Expected IFDR as a function of  $p$  for each estimator with  $m=500$ ,  $\pi_0=0.9$  and configuration (a).



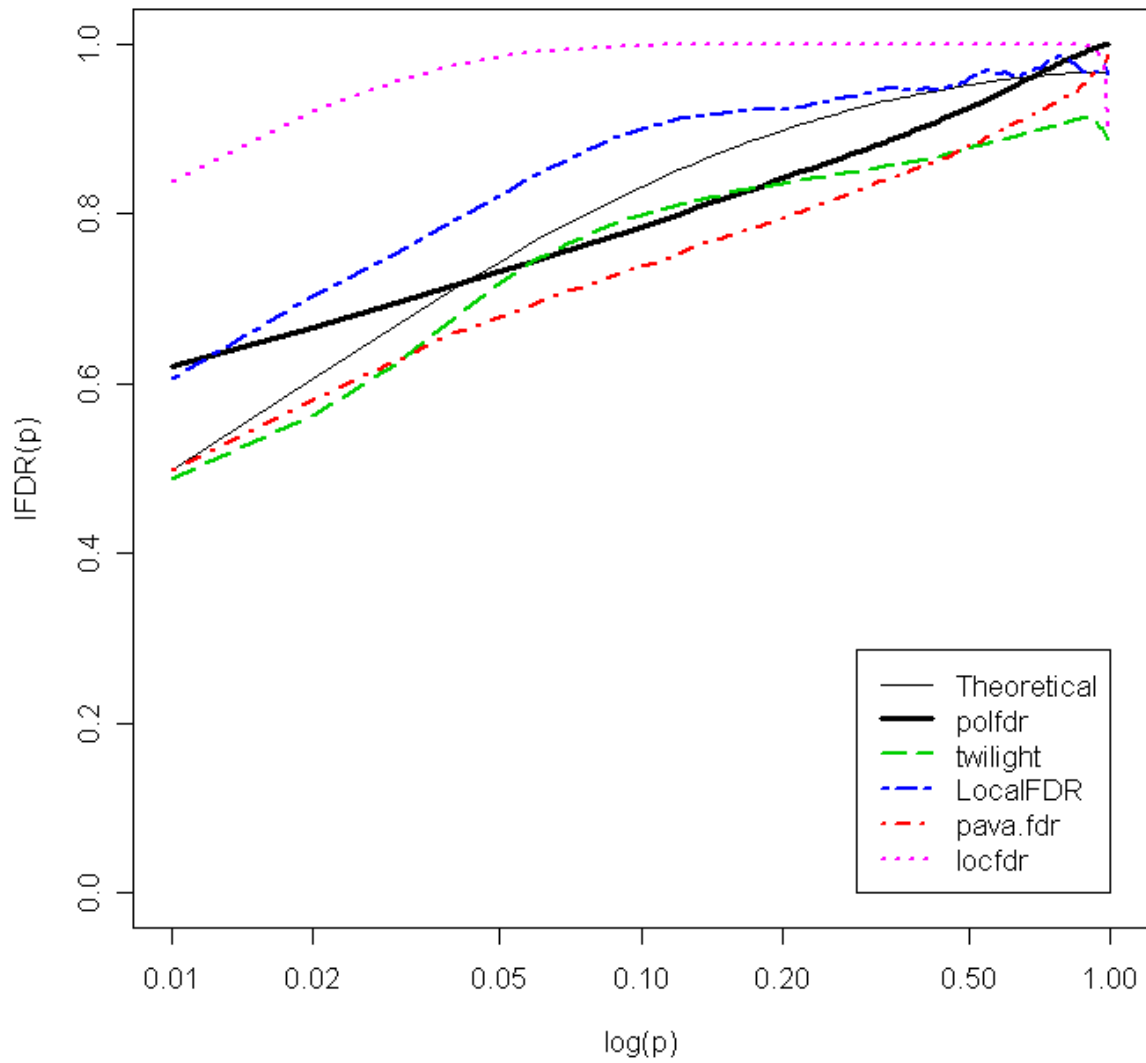

Figure 37: Expected IFDR as a function of  $p$  for each estimator with  $m=500$ ,  $\pi_0=0.9$  and configuration (b).

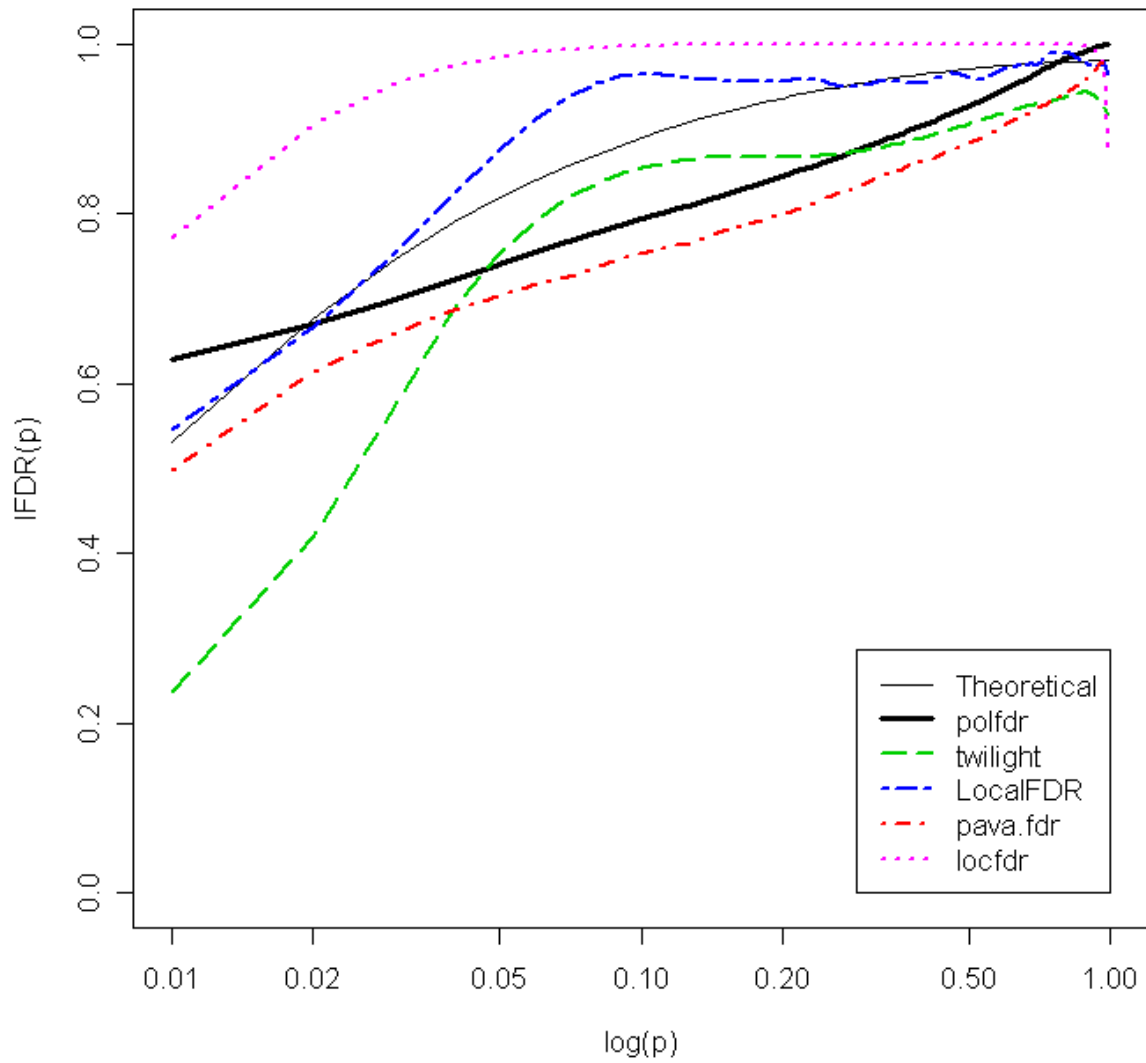

Figure 38: Expected IFDR as a function of  $p$  for each estimator with  $m=500$ ,  $\pi_0=0.9$  and configuration (c).

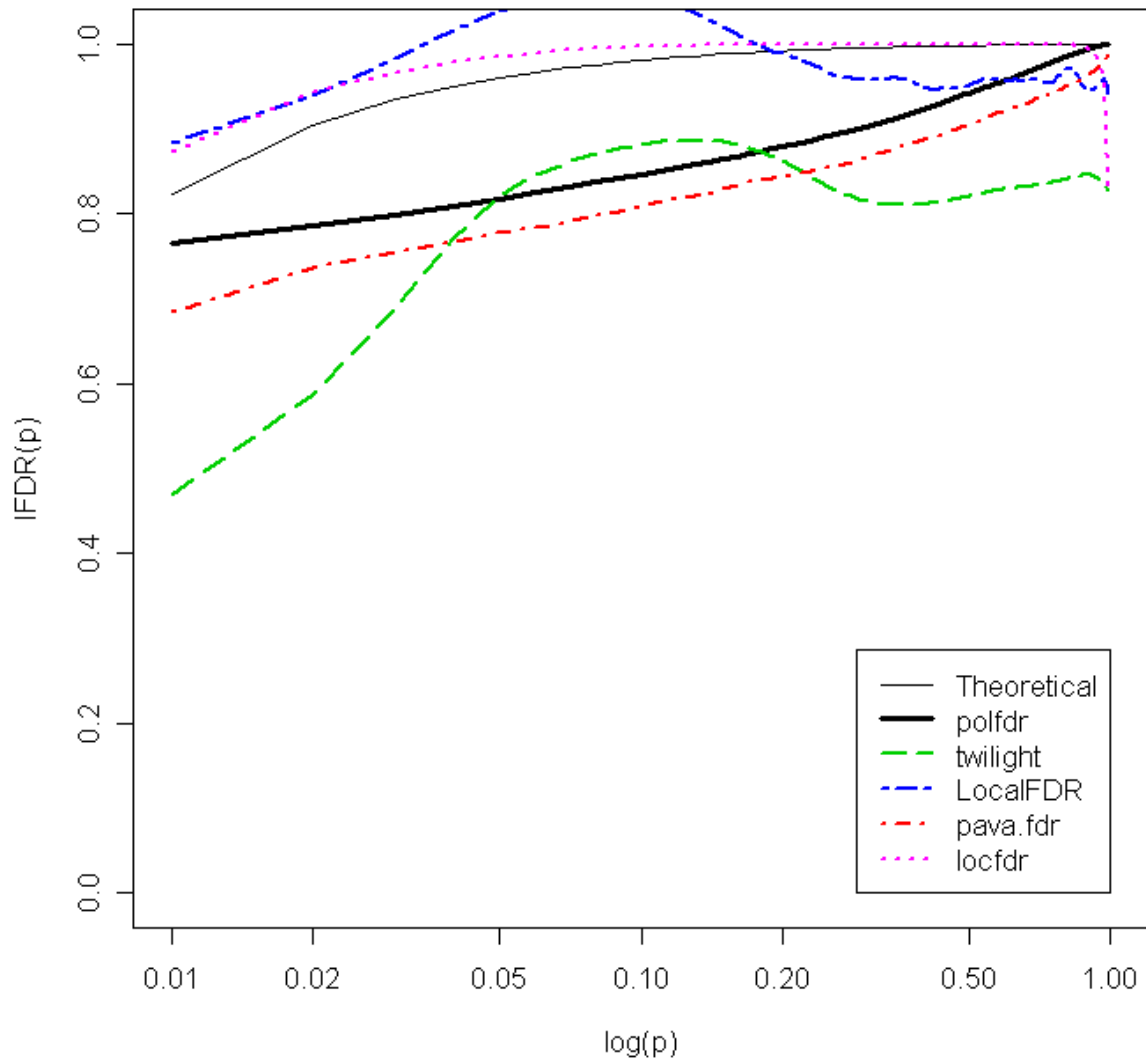

Figure 39: Expected IFDR as a function of  $p$  for each estimator with  $m=500$ ,  $\pi_0=0.98$  and configuration (a).

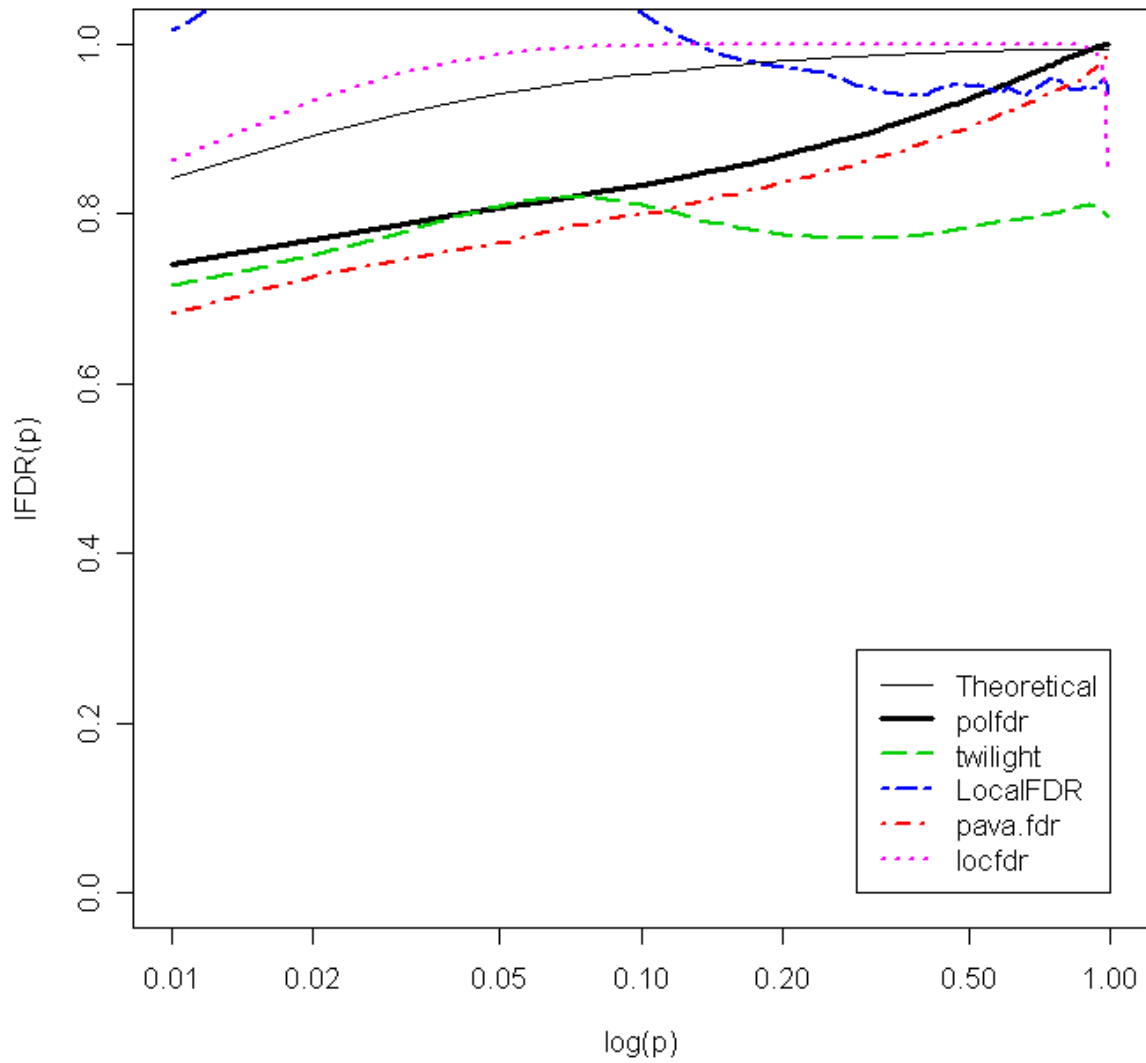

Figure 40: Expected IFDR as a function of  $p$  for each estimator with  $m=500$ ,  $\pi_0=0.98$  and configuration (b).

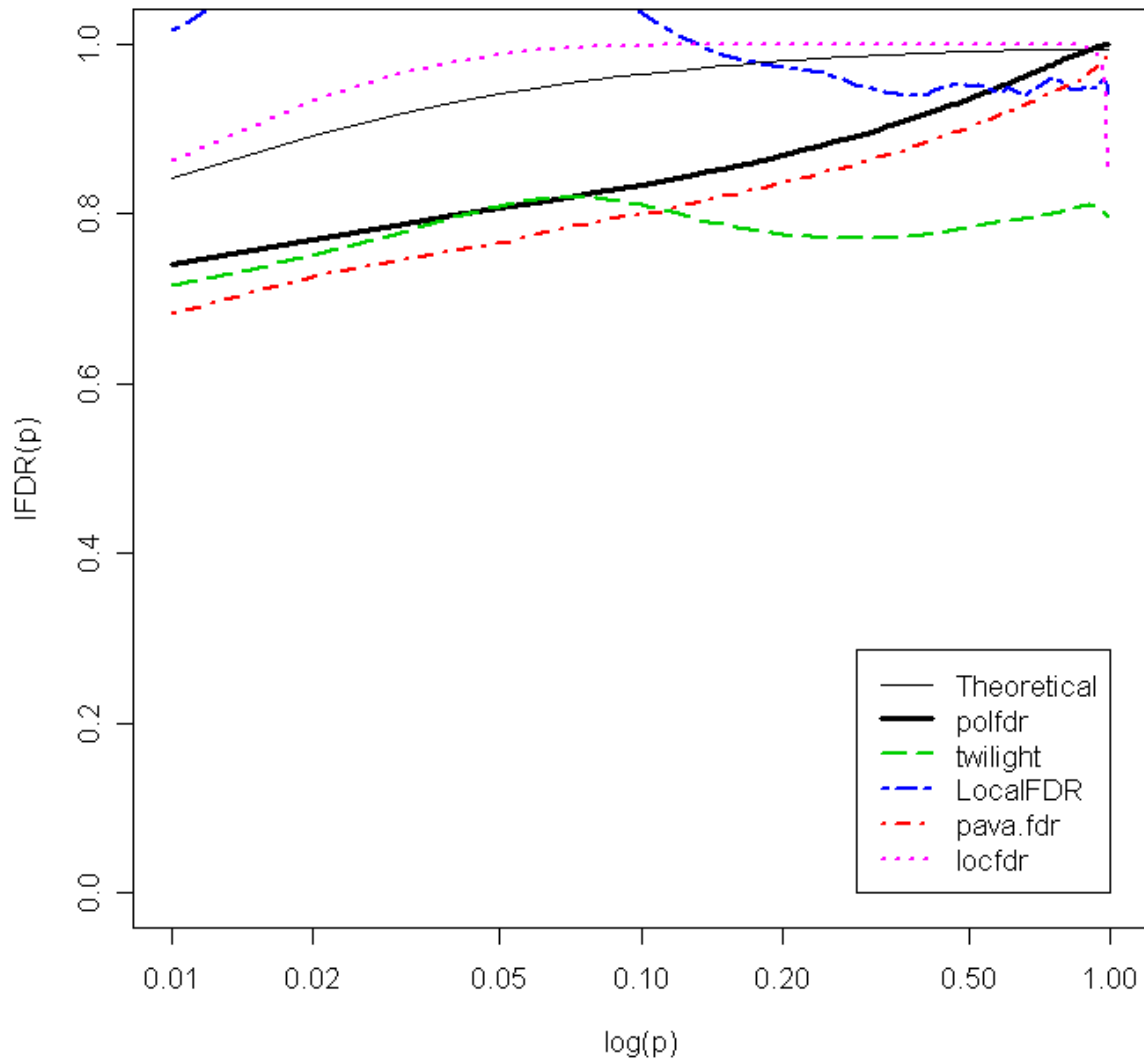

Figure 41: Expected IFDR as a function of  $p$  for each estimator with  $m=500$ ,  $\pi_0=0.98$  and configuration (c).

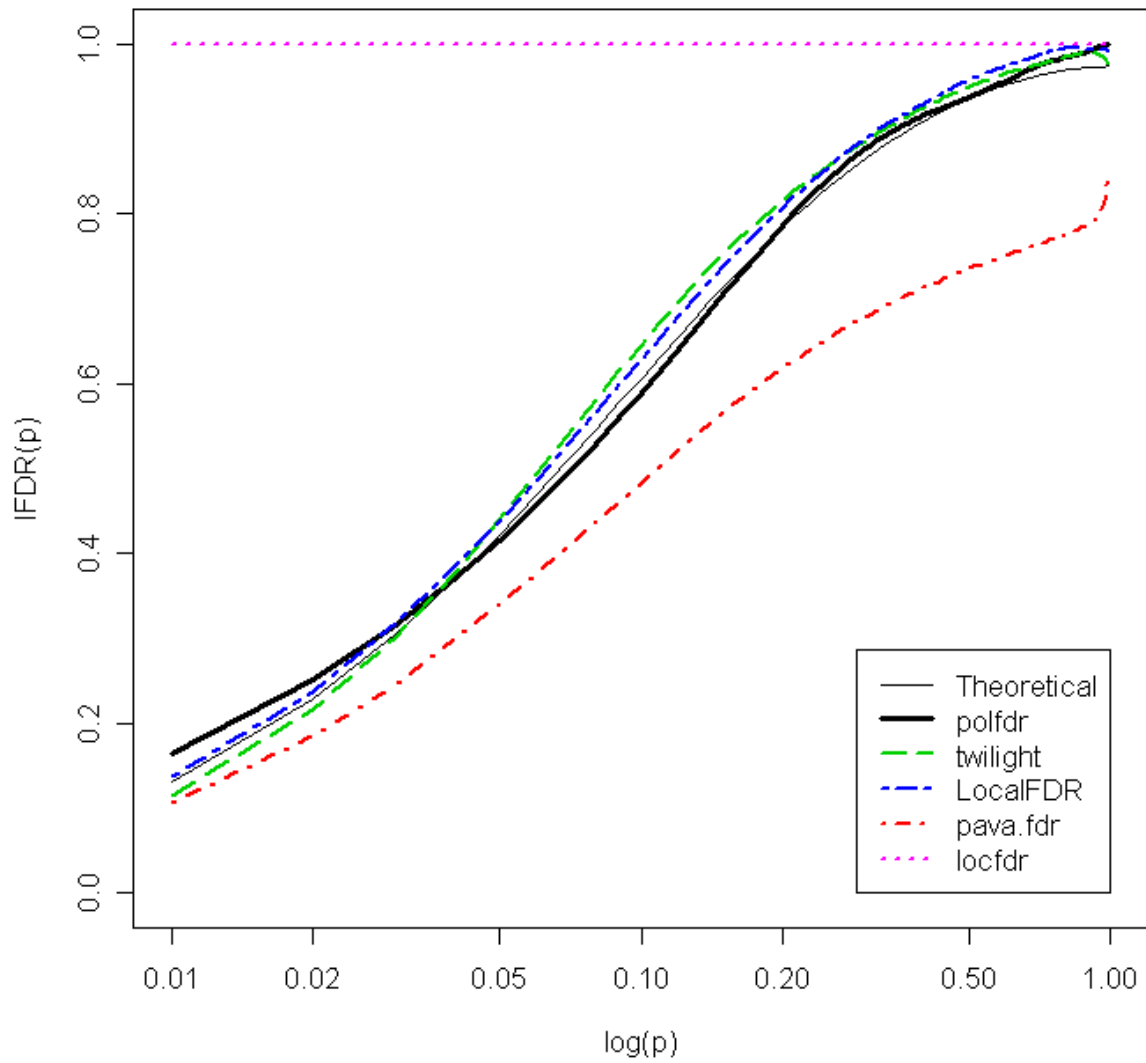

Figure 42: Expected IFDR as a function of  $p$  for each estimator with  $m=5000$ ,  $\pi_0=0.6$  and configuration (a).

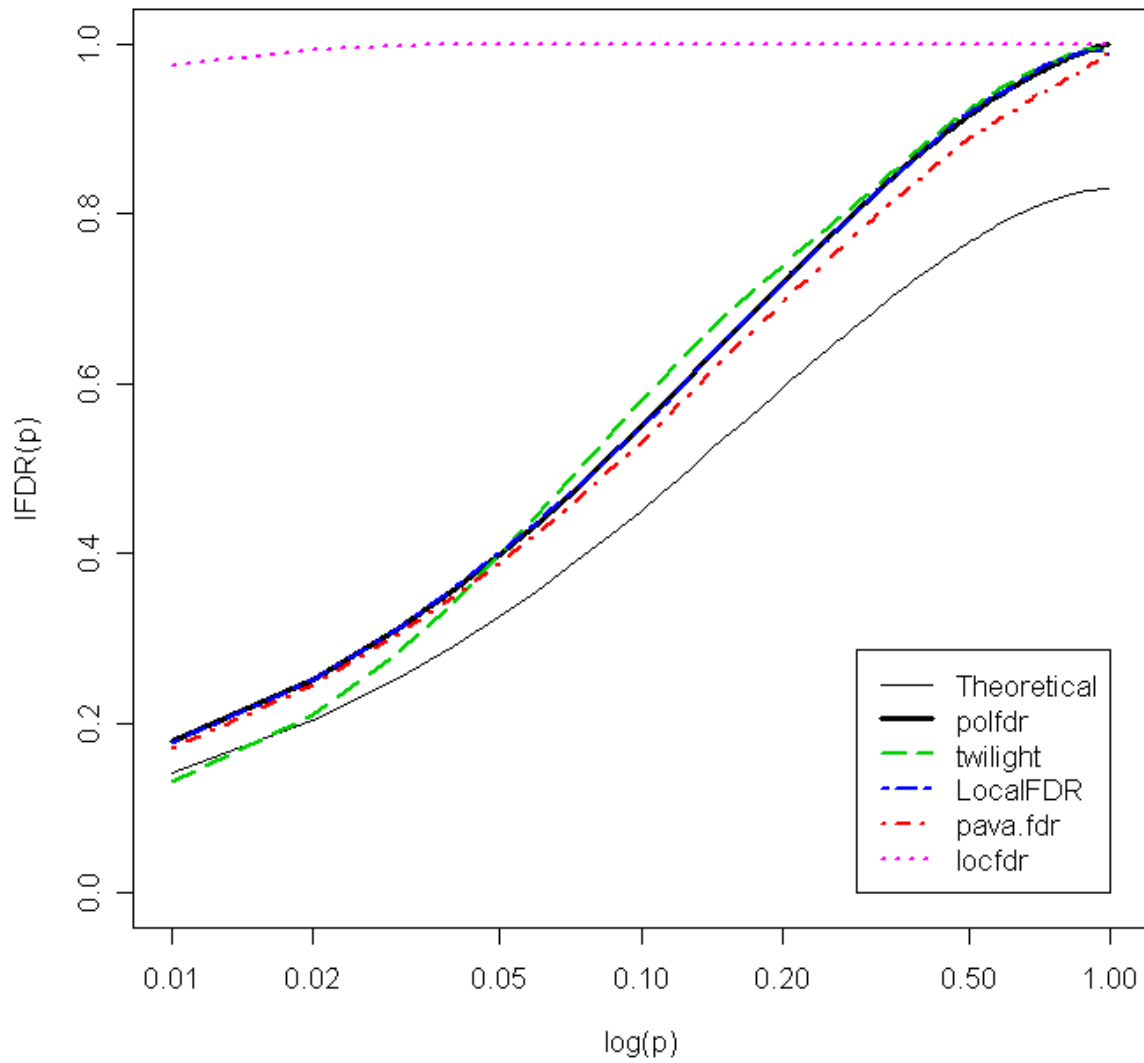

Figure 43: Expected IFDR as a function of  $p$  for each estimator with  $m=5000$ ,  $\pi_0=0.6$  and configuration (b).

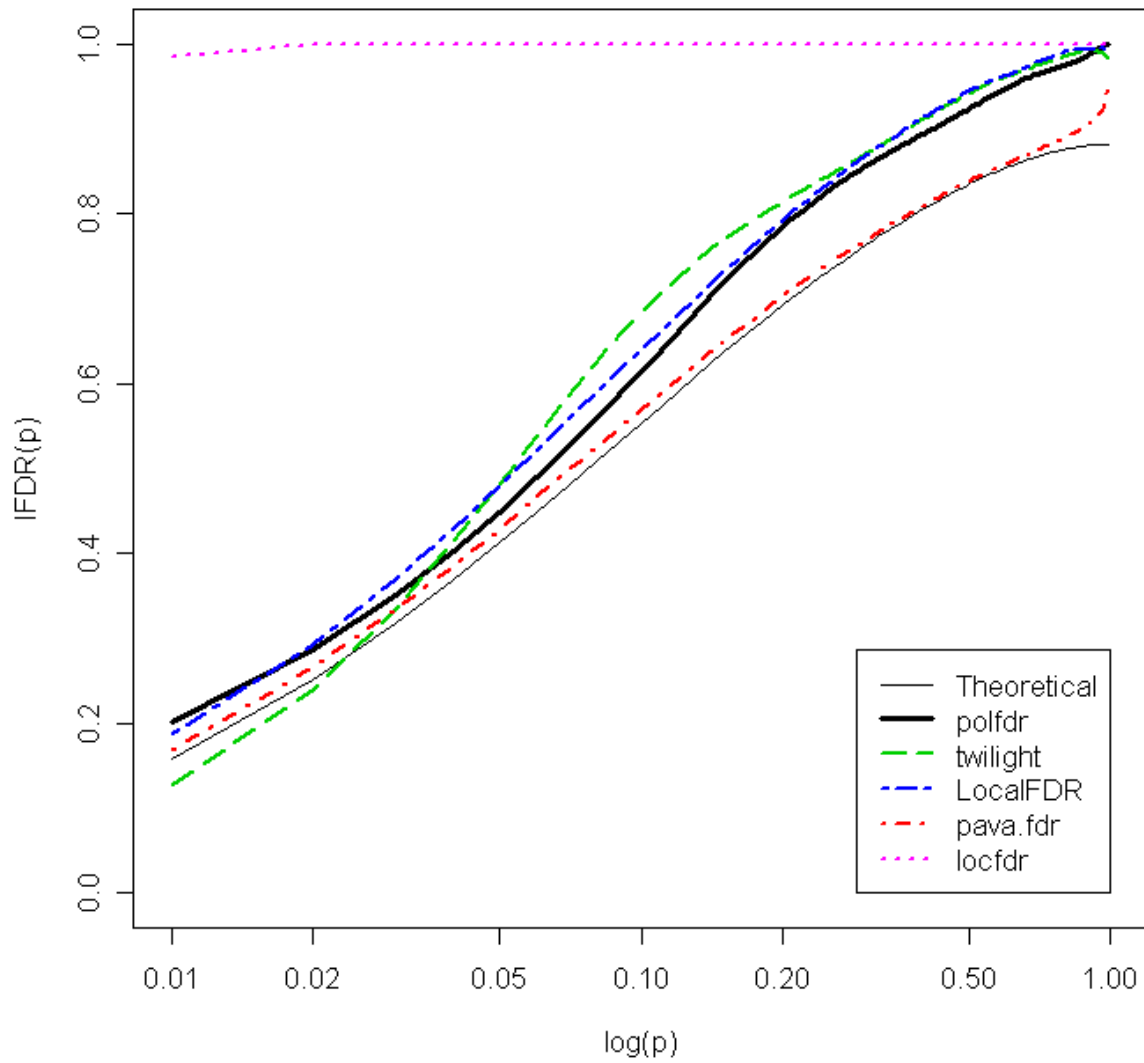

Figure 44: Expected IFDR as a function of  $p$  for each estimator with  $m=5000$ ,  $\pi_0=0.6$  and configuration (c).



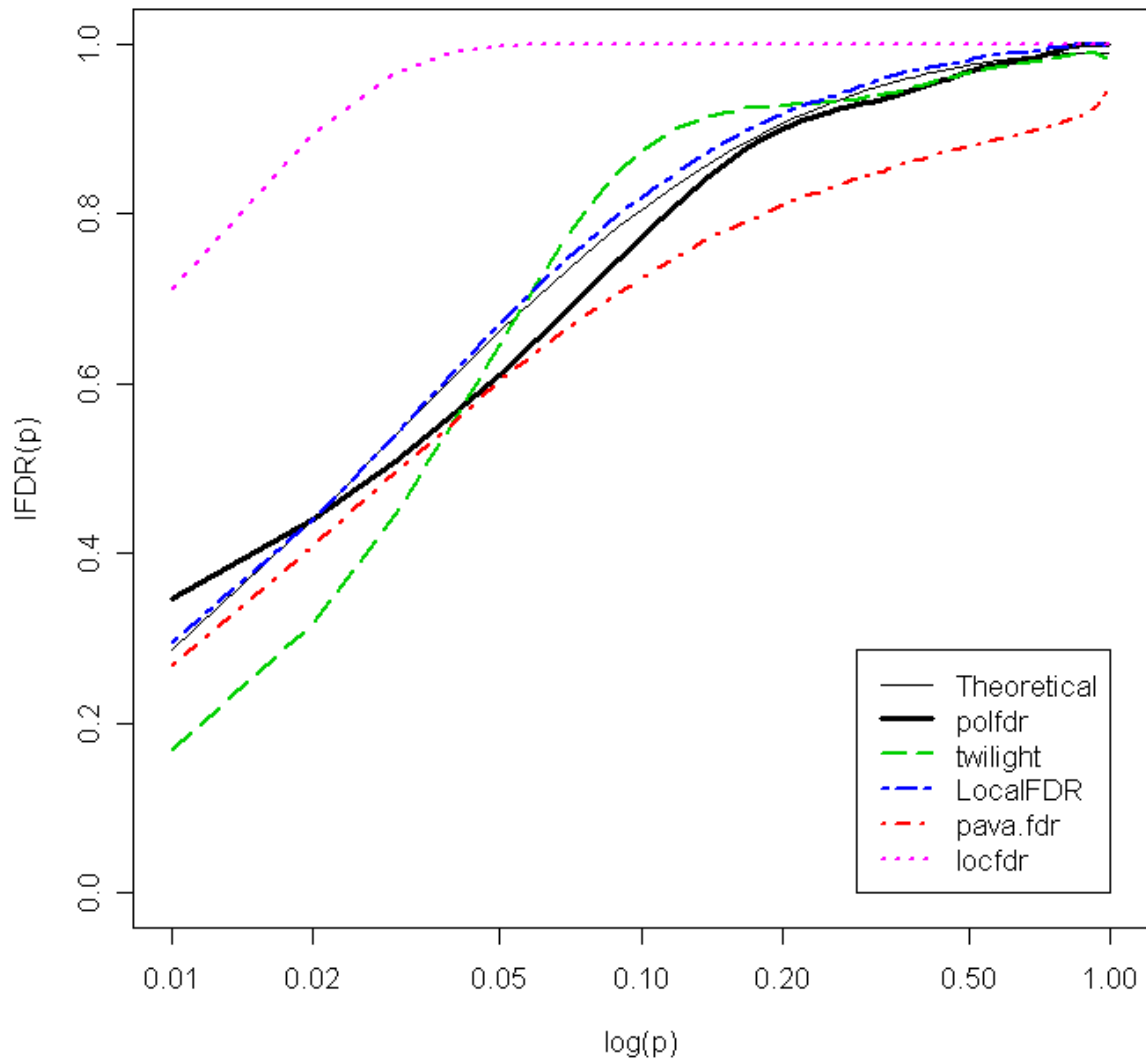

Figure 45: Expected IFDR as a function of  $p$  for each estimator with  $m=5000$ ,  $\pi_0=0.8$  and configuration (a).

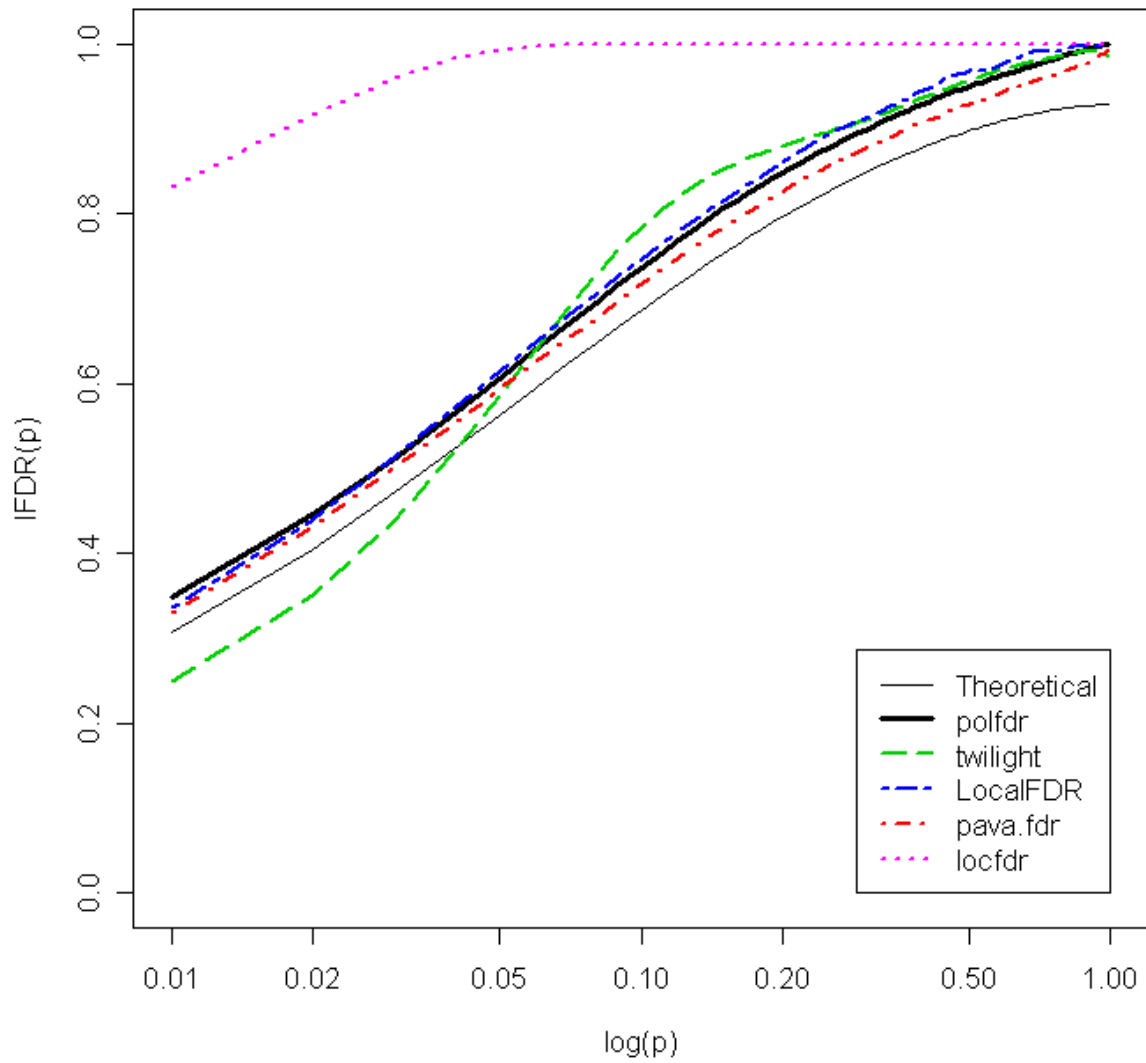

Figure 46: Expected IFDR as a function of  $p$  for each estimator with  $m=5000$ ,  $\pi_0=0.8$  and configuration (b).

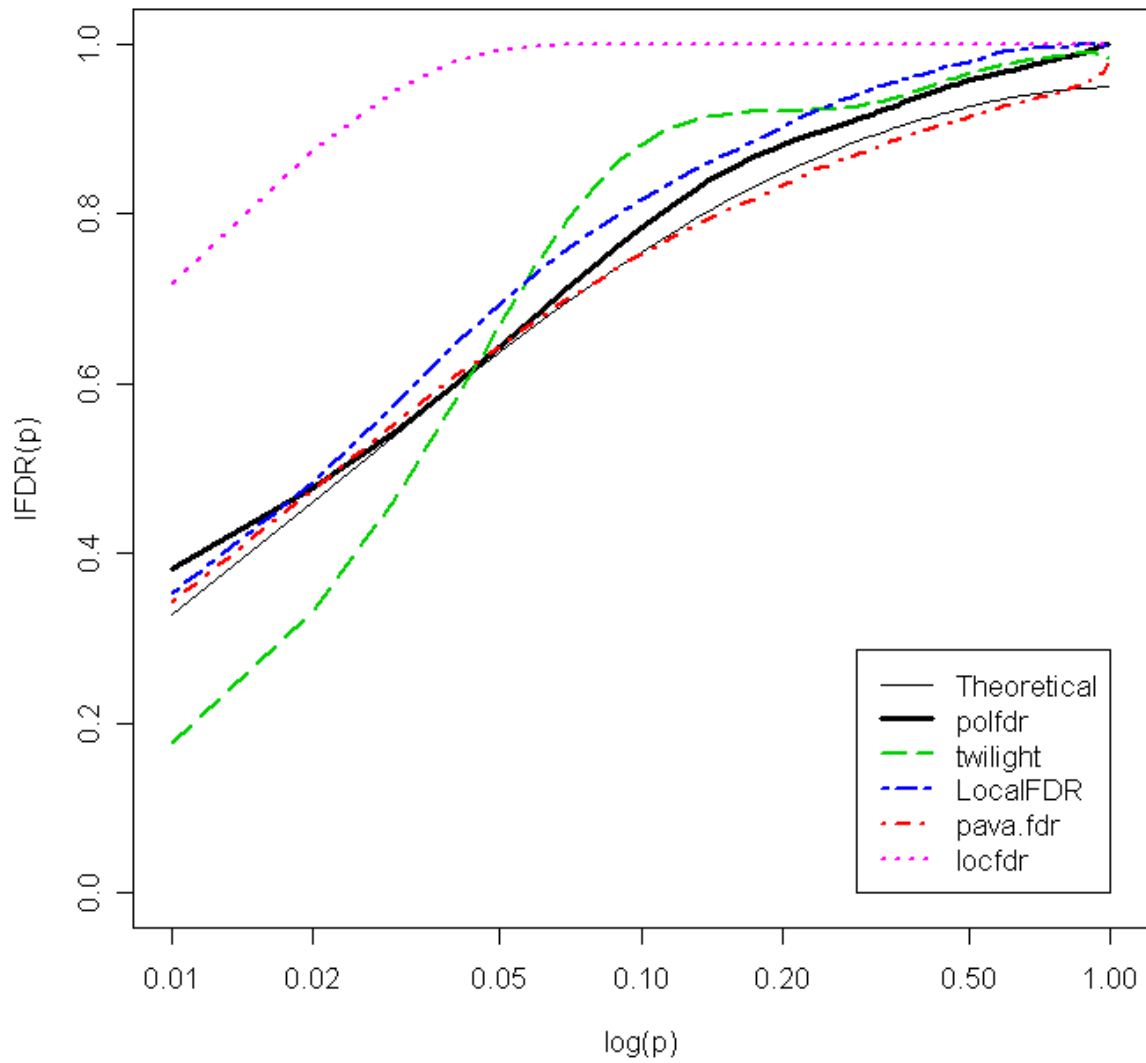

Figure 47: Expected IFDR as a function of  $p$  for each estimator with  $m=5000$ ,  $\pi_0=0.8$  and configuration (c).

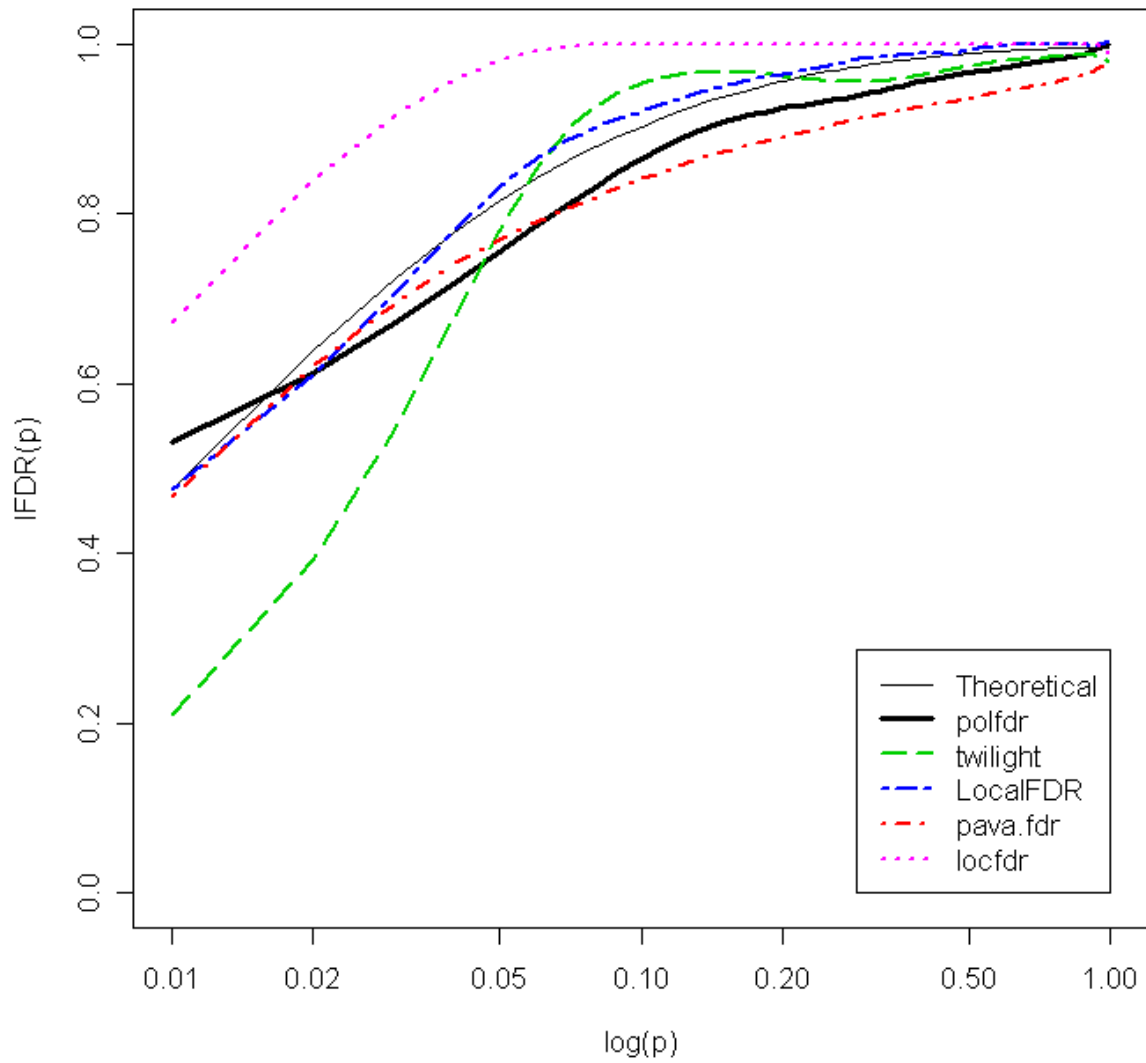

Figure 48: Expected IFDR as a function of  $p$  for each estimator with  $m=5000$ ,  $\pi_0=0.9$  and configuration (a).

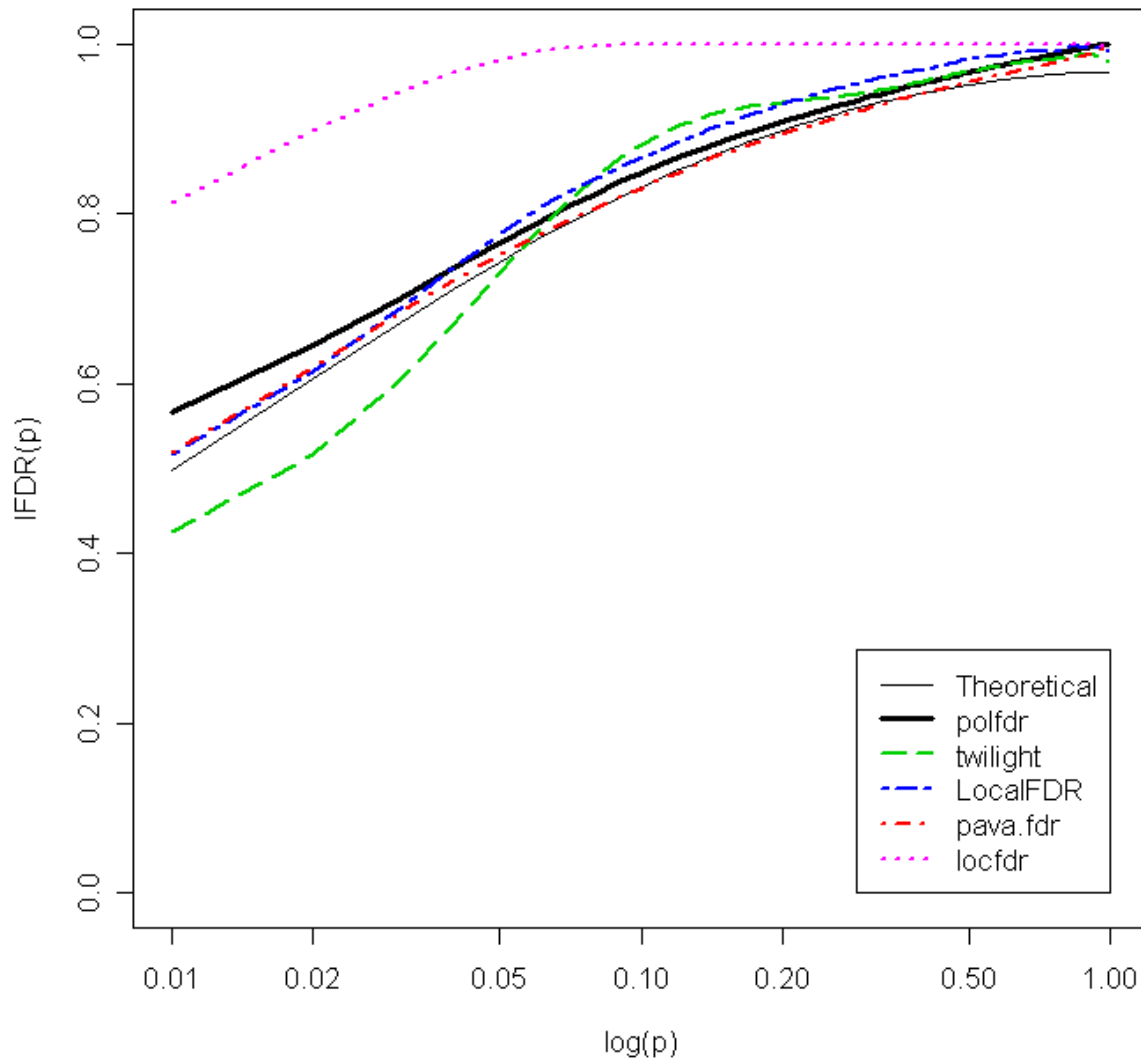

Figure 49: Expected IFDR as a function of  $p$  for each estimator with  $m=5000$ ,  $\pi_0=0.9$  and configuration (b).

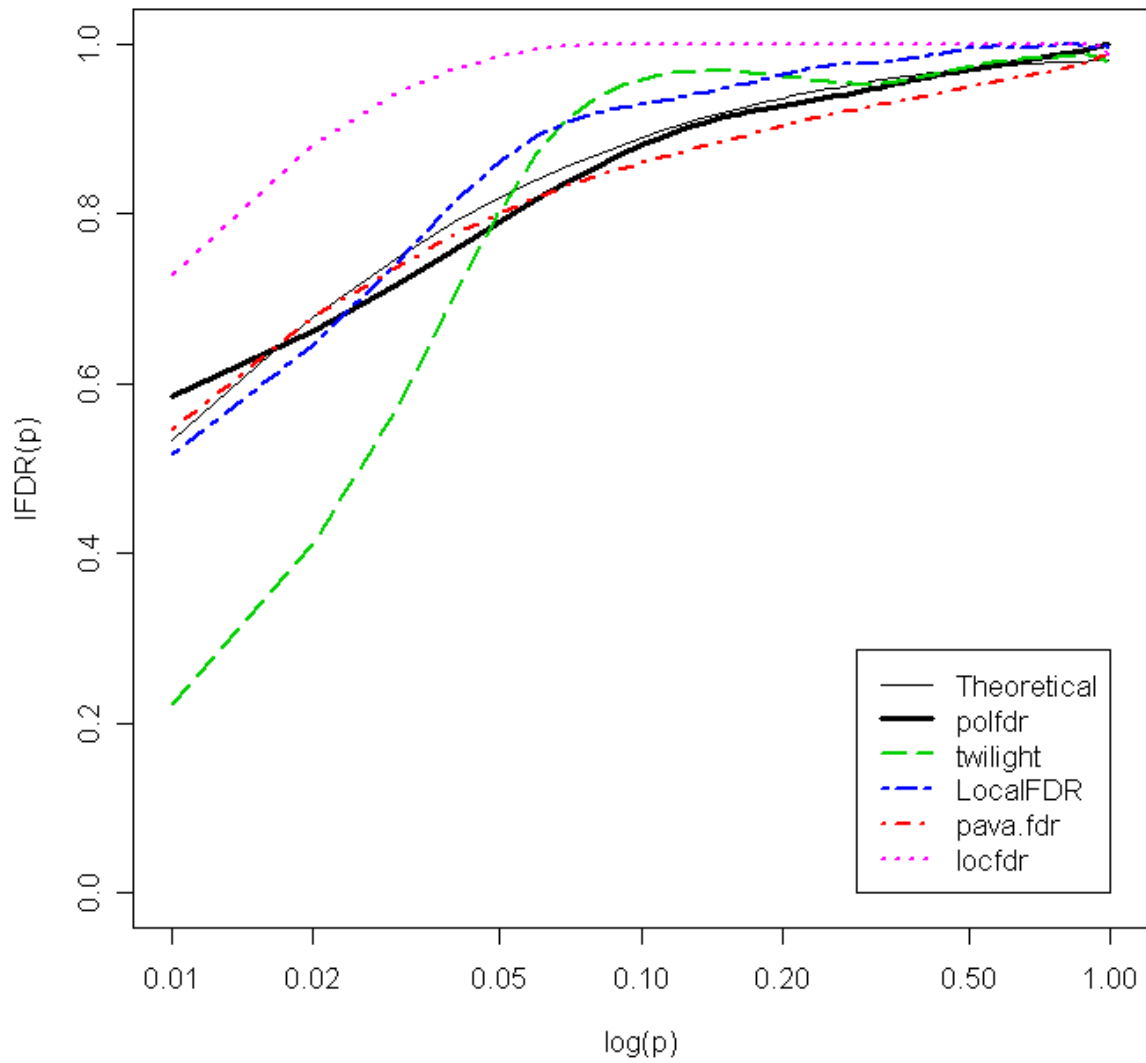

Figure 50: Expected IFDR as a function of  $p$  for each estimator with  $m=5000$ ,  $\pi_0=0.9$  and configuration (c).

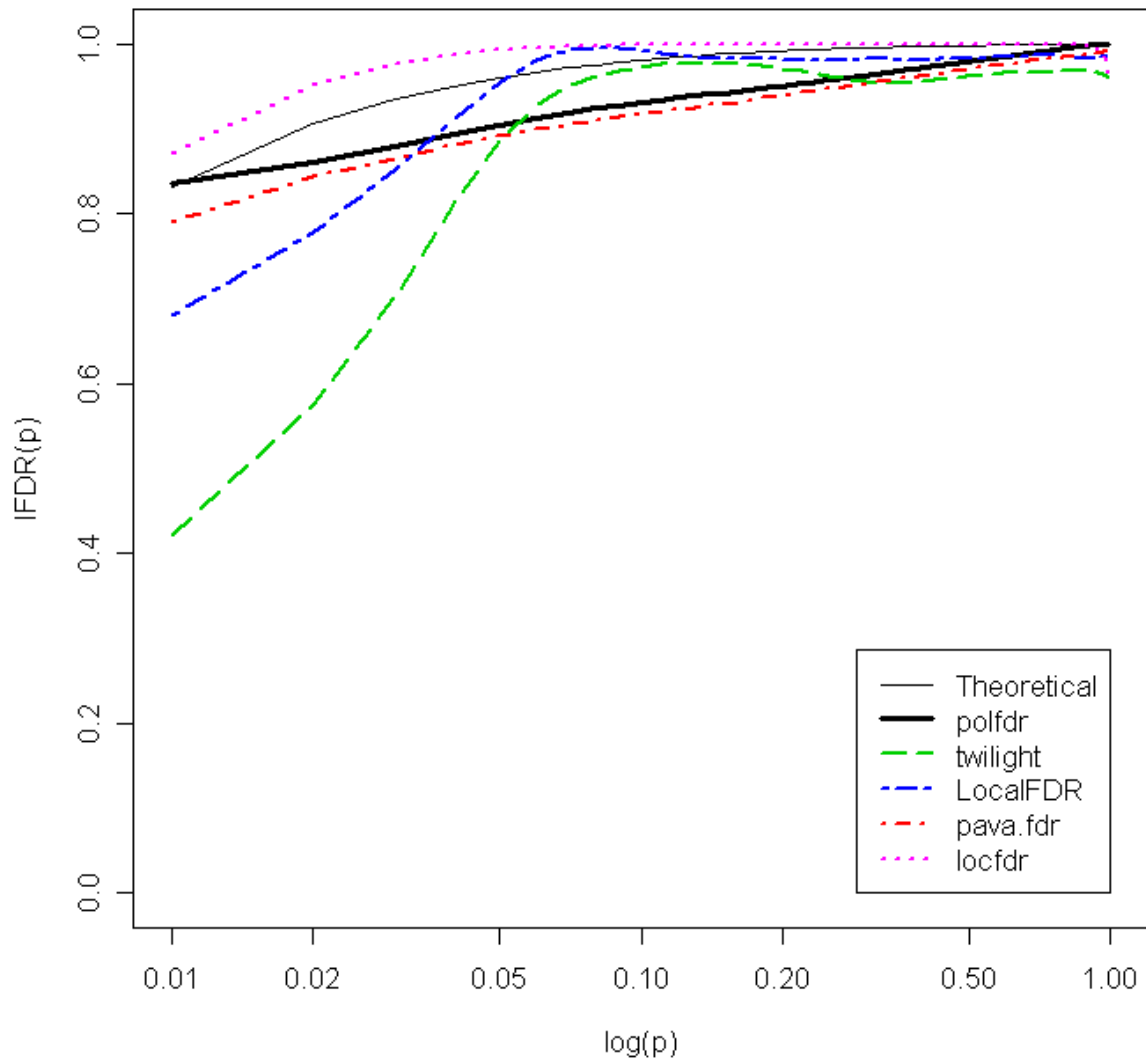

Figure 51: Expected IFDR as a function of  $p$  for each estimator with  $m=5000$ ,  $\pi_0=0.98$  and configuration (a).

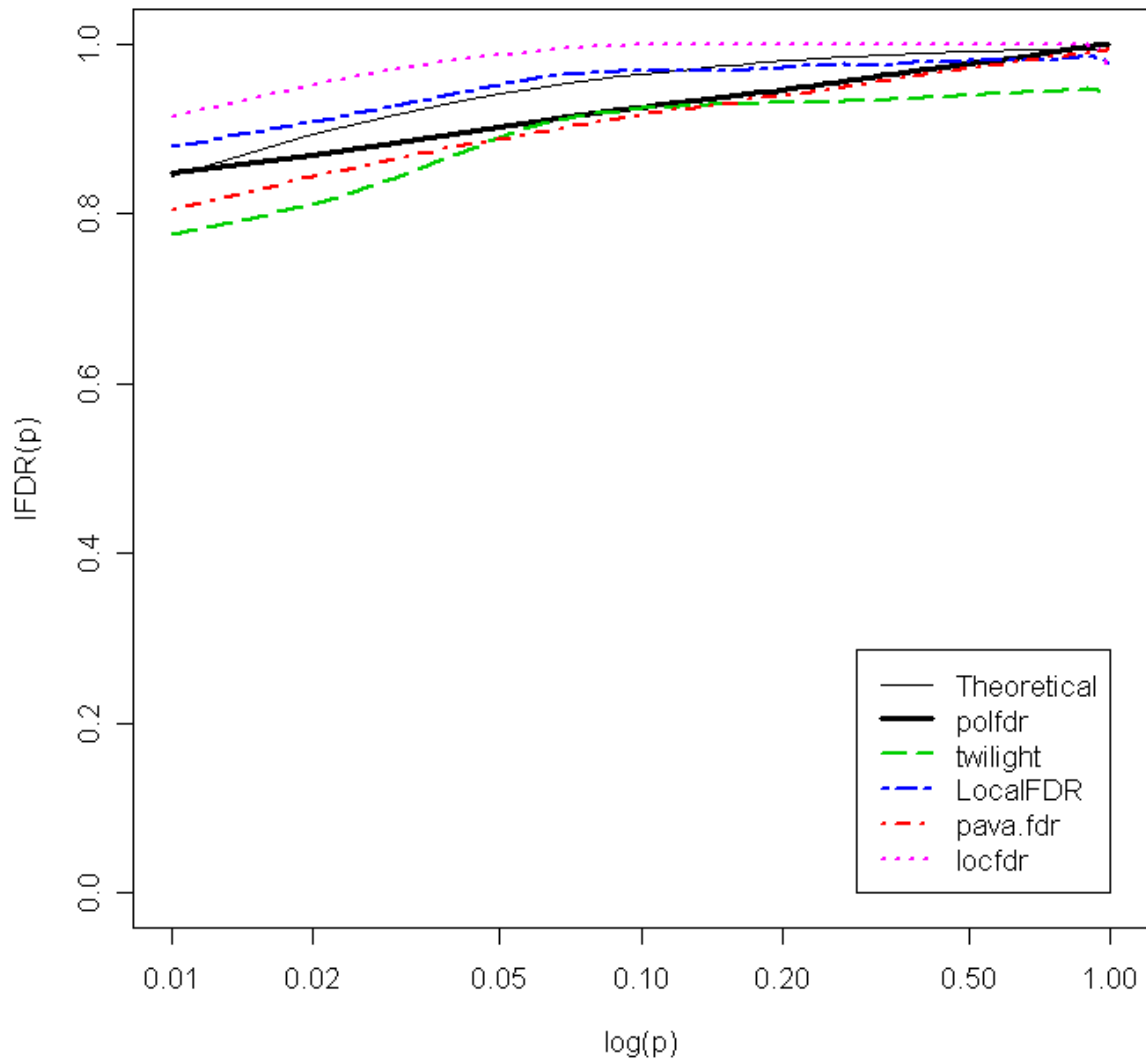

Figure 52: Expected IFDR as a function of  $p$  for each estimator with  $m=5000$ ,  $\pi_0=0.98$  and configuration (b).



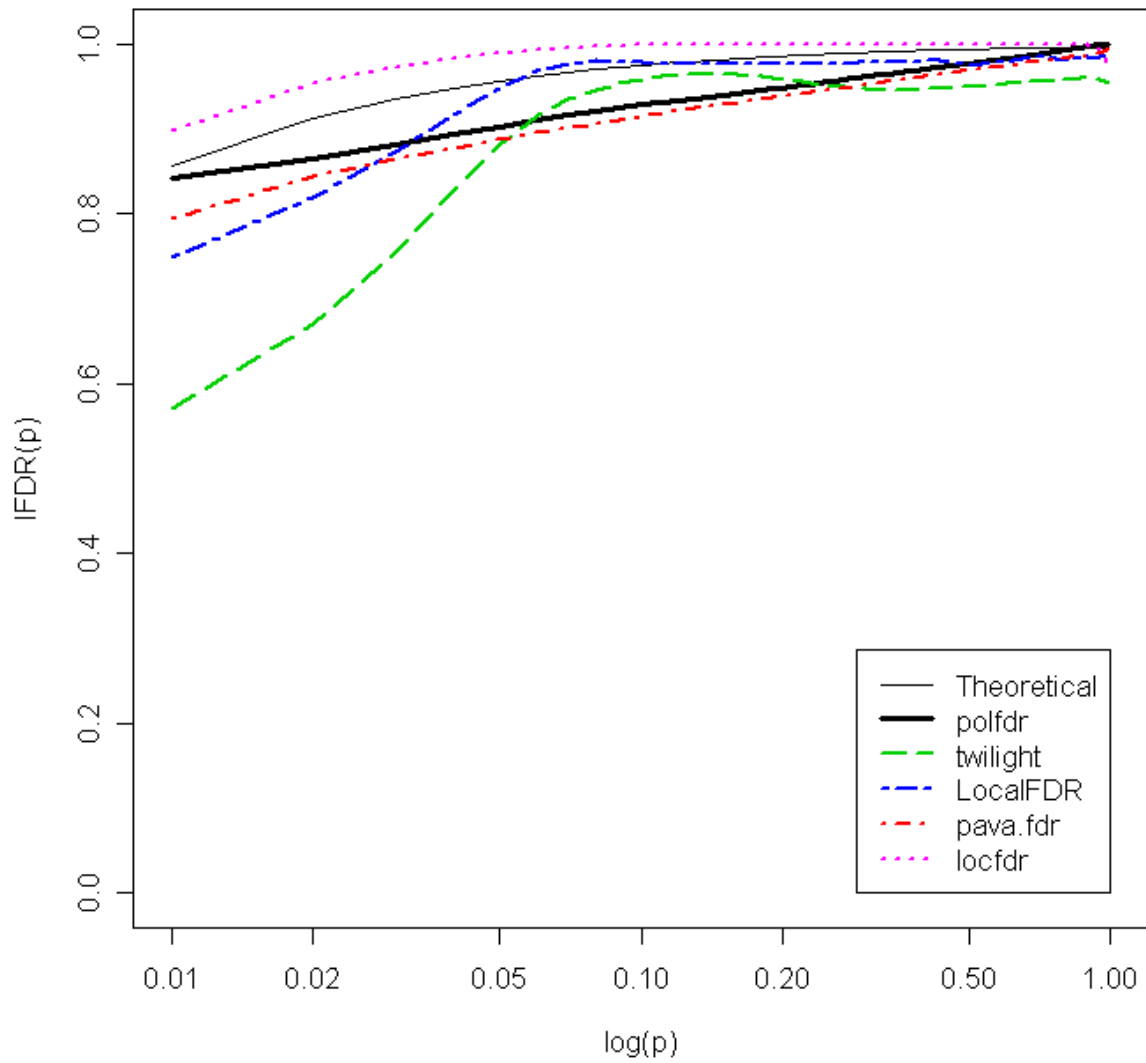

Figure 53: Expected IFDR as a function of  $p$  for each estimator with  $m=5000$ ,  $\pi_0=0.98$  and configuration (c).
